# Supplementary material for: Epidemiology of overweight and obesity in early childhood in the Gulf Cooperation Council countries: a systematic review and meta-analysis protocol
Source: PubMed Central journal article supplement — BMJ Open. 2018 Jun 8;8(6):e019363. doi: 10.1136/bmjopen-2017-019363 (PMC6009465; doi:10.1136/bmjopen-2017-019363), 2018-06-08
Supplement: bmjopen-2017-019363.draft_revisions.pdf [file bmjopen-2017-019363.draft_revisions.pdf]

# BMJ Open

BMJ Open is committed to open peer review. As part of this commitment we make the peer review history of every article we publish publicly available.

When an article is published we post the peer reviewers' comments and the authors' responses online. We also post the versions of the paper that were used during peer review. These are the versions that the peer review comments apply to.

The versions of the paper that follow are the versions that were submitted during the peer review process. They are not the versions of record or the final published versions. They should not be cited or distributed as the published version of this manuscript.

BMJ Open is an open access journal and the full, final, typeset and author-corrected version of record of the manuscript is available on our site with no access controls, subscription charges or pay-per-view fees (<http://bmjopen.bmj.com>).

If you have any questions on BMJ Open's open peer review process please email [info.bmjopen@bmj.com](mailto:info.bmjopen@bmj.com)

# BMJ Open

## Epidemiology of overweight and obesity in early childhood in the Gulf Cooperation Council countries: a systematic review and meta-analysis protocol

|                               |                                                                                                                                                                                                                                                                                                                                                                                                                                                 |
|-------------------------------|-------------------------------------------------------------------------------------------------------------------------------------------------------------------------------------------------------------------------------------------------------------------------------------------------------------------------------------------------------------------------------------------------------------------------------------------------|
| Journal:                      | <i>BMJ Open</i>                                                                                                                                                                                                                                                                                                                                                                                                                                 |
| Manuscript ID                 | bmjopen-2017-019363                                                                                                                                                                                                                                                                                                                                                                                                                             |
| Article Type:                 | Protocol                                                                                                                                                                                                                                                                                                                                                                                                                                        |
| Date Submitted by the Author: | 31-Aug-2017                                                                                                                                                                                                                                                                                                                                                                                                                                     |
| Complete List of Authors:     | Nahas, Mahmoud; Ministry of Health, Kingdom of Saudi Arabia, School Health ;<br>Asamoah, Felix ; Queen Mary, University of London<br>Mullen, Stephen ; Paediatric Emergency Department, University Hospitals of Wales,<br>Nwaru, Bright; The University Of Edinburgh, Allergy & Respiratory Research Group, Centre for Population Health Sciences<br>Nurmatov, Ulugbek; Division of Population Medicine, School of Medicine, Cardiff University |
| Keywords:                     | Obesity, children, the Gulf Cooperation Council (GCC) countries, systematic review                                                                                                                                                                                                                                                                                                                                                              |
|                               |                                                                                                                                                                                                                                                                                                                                                                                                                                                 |

SCHOLARONE™  
Manuscripts

Peer Review Only

1  
2  
3 **Epidemiology of overweight and obesity in early childhood in the Gulf Cooperation Council**  
4 **countries: a systematic review and meta-analysis protocol**  
5  
6

7 Mahmoud Nahhas,<sup>1</sup> Felix Asamoah,<sup>2-3</sup> Stephen Mullen,<sup>4</sup> Bright I Nwaru,<sup>5-7</sup> Ulugbek  
8 Nurmatov<sup>8</sup>  
9

10  
11 <sup>1</sup>Ministry of Health, Riyadh, The Kingdom of Saudi Arabia

12 <sup>2</sup>School of Medicine and Dentistry, Queen Mary, University of London, UK;

13 <sup>3</sup>NHS England, UK

14 <sup>4</sup>Paediatric Emergency Department, University Hospitals of Wales, UK

15 <sup>5</sup>Usher Institute of Population Health Sciences and Informatics, The University of Edinburgh,  
16 UK

17 <sup>6</sup>Faculty of Social Sciences/Health Sciences, University of Tampere, Finland

18 <sup>7</sup>Krefting Research Centre, Institute of Medicine, University of Gothenburg, Sweden

19 <sup>8</sup>Division of Population Medicine, School of Medicine, Cardiff University, Wales, UK  
20  
21  
22  
23  
24  
25  
26  
27  
28  
29  
30  
31  
32  
33  
34  
35  
36  
37  
38

39 Correspondence to:

40  
41 Dr. Mahmoud Nahhas; [Manahas@moh.gov.sa](mailto:Manahas@moh.gov.sa)

42 Director General of School Health Department, Ministry of Health, Kingdom of Saudi Arabia  
43 Riyadh, 11176

44 Phone: +966 112124624  
45  
46  
47  
48  
49  
50  
51  
52  
53  
54

55 **Keywords**  
56  
57  
58  
59  
60

1  
2  
3 Obesity, children, early years, epidemiology, risk factors, the Gulf Cooperation Council (GCC)  
4 countries, systematic review

5 **ABSTRACT**

6  
7 **Introduction:** There has been a notable increase in the prevalence of overweight and obesity  
8 in school-aged children in many industrialised regions. The worldwide prevalence of  
9 childhood overweight and obesity increased from 4.2% in 1990 to 6.7% in 2010. Although  
10 many studies have been published, the epidemiological burden of overweight and obesity in  
11 the Gulf Cooperation Council (GCC) countries (Bahrain, Kuwait, Oman, Qatar, Saudi Arabia,  
12 and the United Arab Emirates) is unclear. There is a need to bring together and appraise  
13 relevant studies in order to estimate the epidemiological burden (including incidence,  
14 prevalence, risk factors, trend over time) of overweight and obesity in this region and thus  
15 help to inform national and regional policies.  
16

17  
18 **Methods and analysis:** We will conduct a systematic review and meta-analysis on the  
19 epidemiology of overweight and obesity in early childhood in the GCC countries. We will  
20 search international electronic databases for published, unpublished and in-progress  
21 epidemiological studies of interest published from inception to 2017. In addition, we will  
22 contact an international panel of experts on the topic. There will be no restriction on the  
23 language of publication of studies. We will use the Effective Public Health Practice Project  
24 (EPHPP) to appraise the methodological quality of included studies. Meta-analysis will be  
25 undertaken using random effects models.  
26

27 **Ethics and dissemination:** Ethical approval is not required. The outcome of the review will  
28 be disseminated through conference presentations and peer-reviewed journal publication.  
29

30 **Protocol registration number:** International Prospective Register for Systematic Reviews  
31 (PROSPERO) number CRD42017073189  
32

33 **Strengths and limitations of this study:**

- 34  
35  
36  
37  
38  
39  
40  
41  
42  
43  
44  
45  
46  
47  
48  
49  
50  
51  
52  
53  
54  
55  
56  
57  
58  
59  
60
- This systematic review will for the first time provide estimates of the epidemiological burden of overweight and obesity in early childhood across the GCC region and within each nation
  - Understanding the burden of overweight and obesity during the early years will help to formulate and strengthen national family and school policies for children in this age group in the GCC region.
  - Whilst this study will provide a comprehensive overview of the burden of overweight and obesity in the GCC region, we anticipate disparities across available studies, and this will be taken into account in our interpretation of the underlying evidence

## INTRODUCTION

Childhood overweight and obesity is a global health problem, impacting the physical and psychological health of individuals for the duration of their life.<sup>1-5</sup> Childhood overweight and obesity strongly correlate with adult obesity, which is linked to an increased risk of morbidity and mortality.<sup>6,7</sup> Overweight or obese children have an increased risk of heart disease, diabetes and other health problems in adulthood.<sup>2</sup> The impact is not limited to the individual but carries a significant economic burden.<sup>8</sup> This is partially due to increased spending on healthcare with a German study estimating the excess lifetime cost of childhood overweight and obesity in the German population at €145 billion.<sup>9</sup>

According to the World Health Organisation (WHO), 43 million children (35 million from developing countries) were estimated to be overweight and obese in 2010, while 92 million worldwide were at risk of being overweight.<sup>10</sup> In the same report, the worldwide prevalence of childhood overweight and obesity combined increased from 4.2% (95% CI: 3.2% to 5.2%) in 1990 to 6.7% (95% CI: 5.6% to 7.7%) in 2010. This trend is expected to reach 9.1% (95% CI: 7.3%, 10.9%) or affect 60 million children by 2020.<sup>10</sup>

The prevalence of childhood obesity is high among Gulf Cooperation Council (GCC) countries (Bahrain, Kuwait, Oman, Qatar, Saudi Arabia, and the United Arab Emirates), with the prevalence of obesity among pre-school children estimated to be between 8% to 9%.<sup>11</sup> In Kuwait, for instance, 40-49% of adolescents are obese.<sup>11</sup> Kuwait ranks among the top 7% of countries worldwide in reference to adult obesity prevalence,<sup>1,12</sup> and is among the top 3% of countries with the highest prevalence of diabetes.<sup>13</sup> The recognition of childhood overweight and obesity and the long-term consequences, has made it a high priority for health authorities in the GCC countries<sup>14,15</sup> and globally.<sup>1,16</sup>

Currently there is paucity of robust epidemiological data on childhood overweight and obesity in the GCC countries. A number of studies suggest that trends in childhood overweight and obesity in GCC countries may be increasing.<sup>17-21</sup> However, despite several studies that have been published the epidemiological burden of overweight or obesity in the GCC is currently unclear. There is a need to bring together the relevant available evidence and synthesise them in order to derive relevant epidemiological parameters (including incidence, prevalence, risk factors, trend over time) that will help to describe current burden

1  
2  
3 of overweight and obesity in the GCC region. This will help to formulate or strengthen  
4 existing regional and national policies around obesity, particularly in relation to school and  
5 early years nutrition and lifestyle.  
6  
7

8  
9 We plan to undertake a systematic review to identify, appraise and synthesise all available  
10 evidence on the epidemiology of overweight and obesity in children during the early years of  
11 life in the GCC region. Specifically, by bringing together all relevant published evidence, this  
12 systematic review aims to provide reliable and contemporaneous estimates of the incidence,  
13 prevalence, time trends, risk factors for childhood overweight and obesity in GCC countries  
14 in children during the early life years. The focus on the early years of childhood is to identify  
15 early dominant factors that may in the long-term help in formulating evidence-based  
16 policies for early interventions.  
17  
18  
19  
20  
21  
22

## 23 **METHODS AND ANALYSES**

### 24 **Types of studies**

25  
26 We will include all interventional (randomised controlled trials, controlled before and after  
27 studies, and interrupted time series studies) and observational (cohort, case control, and  
28 cross-sectional studies) studies. Reviews, case studies and case series, and animal studies  
29 will be excluded.  
30  
31  
32  
33  
34  
35

### 36 **Participants**

37 The participants will include all children in their early years (up to 8 years).  
38  
39  
40

### 41 **Outcome measures**

42 *Primary outcomes:* Our primary outcomes will include objectively defined measures of the  
43 incidence and prevalence of obesity in children aged up to 8 years old in GCC countries.  
44  
45

46  
47 *Secondary outcomes:* Secondary outcomes will include time trends and risk factors of  
48 obesity in children aged up to 8 years old in GCC countries.  
49  
50

### 51 **Search methods**

52  
53 We will employ a highly sensitive search strategy to retrieve articles meeting the review  
54 criteria. Appendix 1 contains the search strategies developed for MEDLINE database  
55  
56  
57

1  
2  
3 interface, which we will adapt to search other databases. Databases to search will include  
4 MEDLINE, EMBASE, Cochrane Library, ISI Web of Science, CINAHL, Google Scholar, AMED,  
5 Psych INFO, CAB International, and WHO Global Health Library. Additional references will be  
6 located through searching the references cited in identified papers, as well as searching  
7 databases of the proceedings of international conferences, such as ISI Conference  
8 Proceedings Citation Index and ZETOC (British Library). For unpublished and ongoing studies,  
9 we will contact international experts in the field of research. There will be no language  
10 restrictions, and where possible we will translate literature in languages other than English  
11 and report any literature we are unable to translate.  
12  
13  
14  
15  
16  
17

### 18 **Study selection**

19  
20 Two reviewers will independently check titles and abstracts of the retrieved articles  
21 according to the review criteria; any discrepancies will be resolved by consensus and a third  
22 reviewer will arbitrate disagreements. Full text copies of potentially relevant studies will be  
23 obtained and their eligibility for inclusion independently assessed by two reviewers;  
24 discrepancies will be resolved by consensus and disagreements will be arbitrated by a third  
25 reviewer.  
26  
27  
28  
29  
30

### 31 **Quality assessment and analysis**

32  
33 Two reviewers will independently appraise the quality of eligible studies and assess the  
34 potential for risk of bias; any discrepancies will be resolved by discussion or arbitration by a  
35 third reviewer in the event of any disagreement. We will assess the methodological quality  
36 of observational studies by using the Effective Public Health Practice Project (EPHPP).<sup>22</sup> Will  
37 also derive component-specific (i.e. suitability of the study design for the research question;  
38 risk of selection bias; exposure measurement; outcome assessment; and generalizability of  
39 findings) and overall grading for each observational study.  
40  
41  
42  
43  
44

### 45 **Data extraction and reporting**

46  
47 Two reviewers will independently extract relevant information and study data onto a  
48 customized data extraction sheet. Any discrepancies in data extraction will be resolved by  
49 discussion or arbitration by a third reviewer if agreement cannot be reached. Descriptive  
50 tables will be used to summarize the literature and characteristics of studies contributing to  
51 the overall evidence. We will employ the PRISMA checklist to guide the reporting of the  
52 review.<sup>23</sup>  
53  
54  
55  
56  
57

### Data analysis

We will undertake a narrative synthesis of the data. In addition, for studies deemed to be reasonably clinically, methodologically, and statistically homogeneous, we will perform meta-analyses using random-effects models. We will quantify the heterogeneity between studies using the  $I^2$  statistic. Where possible, we will perform subgroup analyses according to background characteristics, such as age, body mass index, country, and other potential characteristics. We will perform sensitivity analyses based on risk of bias in the studies. We will assess evidence of publication bias using Funnel plots and statistically using Begg and Egger tests.<sup>24,25</sup> The meta-analyses will be performed using Comprehensive Meta-analysis, version 3.

### Protocol registration

A detailed protocol for the review has been registered with the International Prospective Register of Systematic Reviews (PROSPERO CRD42017073189): <http://www.crd.york.ac.uk/prospero/> prior to commencing the review.

### DISCUSSION

The current review will present the most comprehensive and unbiased synthesis of the evidence relating the incidence, prevalence, time trends, and risk of obesity in children in the early years up to 8 years old in GCC countries. Our preliminary searches could not find any systematic reviews on this topic.

### CONCLUSION

Evidence generation and synthesis on up to date estimates of the incidence, prevalence, time trends, and risk factors of obesity/overweight in children in GCC countries will help to develop interventions for overweight or obese children. Furthermore, a comprehensive synthesis of the evidence base will provide the opportunity to create evidence-informed policies in these GCC countries in the prevention of obesity and overweight among children in the early years.

**Acknowledgements:** We thank the Ministry of Health of Saudi Arabia for retrieving unobtainable papers.



**Contributors:** UBN and MN conceived the idea for this study. UBN, BIN and FA developed the methods and together with SM and MN drafted this protocol.

**Competing of interests:** The authors declare no competing interest related to this work.

## REFERENCES

1. World Health Organisation. 2015. Childhood overweight and obesity report. Report of a WHO Consultation. WHO Technical Report Series, No. 894. Geneva: World Health Organisation. Assessed: <http://www.who.int/dietphysicalactivity/childhood/en/>
2. Sabin MA, Kao KT, Juonala M, Baur LA, Wake M. Viepoint article : Childhood obesity – looking back over 50 years to begin to look forward. *Journal of Paediatrics and Child Health*. 2015;51:82-86.
3. Mameli C, Mazzantini S, Zuccotti GV. Nutrition in the first 1000 days: the origin of childhood obesity. *Int J Environ Res Public Health*. 2016;13:838.
4. El-Bayoumy I, Shady I, Lotfy H. Prevalence of obesity among adolescents (10–14 years) in Kuwait. *Asia-Pacific Journal of Public Health*. 2009;21:153-9.
5. Abdulrazzaq Y, Nagelkerke N, Mousa M. UAE population reference standard charts for body mass index and skinfold thickness, at ages 0–18 years. *International Journal of Food Sciences and Nutrition*. 2011;62:692-702.
6. Caliskan A, Atak N. A general review of childhood obesity. *TAF Prev Med Bull*. 2013;12(5):571-582.
7. Xu S, Xue Y. Pediatric obesity: causes, symptoms, prevention and treatment. *Exp Ther Med* 2016;11:15-20.
8. Tremmel M, Gerdtham Ulf-G, Nilsson PM, Saha S. Economic Burden of obesity: a systematic review. *Int J Environ Res Public Health*. 2017;14:435.
9. Sonntag D, Ali S, De Bock F. Lifetime indirect cost of childhood overweight and obesity: a decision analytic model. *Obesity* 2016;24:200-206.
10. De Onis M, Blossner M, Borghi E. Global prevalence and trends of overweight and obesity among preschool children. *Am J Clin Nutr* 2010;92(5):1257-64.
11. Ng SW, Zaghoul, Ali HI, Harrison G, Popkin BM. The prevalence and trends of overweight, obesity and nutrition-related non-communicable diseases in the Arabian Gulf States. *Obesity Reviews*. 2011;12:1-13.
12. WHO, "Global info base international comparisons," 2011, Available at: <https://apps.who.int/infobase/Comparisons.aspx>
13. Mousa M, Alsaes M, Abdella N, Refaid S, Shelike N, Gomez E. Prevalence of type 2 diabetes mellitus among Kuwaiti children and adolescents. *Medical Principles and Practice*. 2008;270-5.
14. Padmakumar Ram. Management of Healthcare in the Gulf Cooperation Council (GCC) countries with special reference to Saudi Arabia. *International Journal of Academic Research in Business and Social Sciences*. 2014;4(12):24-41.

15. Amin TT, Al Sultan AI, Ayub A. Overweight and obesity and their relation to dietary habits and socio demographic characteristics among male primary school children in Al Hassa, Kingdom of Saudi Arabia. *Eur J Nutr* 2008;47(6):310-8.
16. Ogden CL, Carroll MD, Kit BK, Flegal KM. Prevalence of Childhood and Adult Obesity in the United States, 2011-2012. *JAMA*. 2014;311(8):806-814.
17. Mirmiran P, Sherafat-Kazemzadeh R, Jalali-Farahani S, Azizi F. Childhood obesity in the Middle East: a review. *Eastern Mediterranean Health Journal*. 2010;16:1009-17
18. Malik M, Bakir A. Prevalence of overweight and obesity among children in the United Arab Emirates. *Obesity Reviews*. 2006;8:15-20.
19. Al-Sendi A, Shetty P, Musaiger A. Prevalence of overweight and obesity among Bahraini adolescents: a comparison between three different sets of criteria. *European Journal of Clinical Nutrition*. 2003;57:471-4.
20. Eapen V, Mabrouk A, Yousef S. Metabolic syndrome among young obese in the United Arab Emirates. *Journal of Tropical Pediatrics*. 2010;56:325-8.
21. Al-Isa A, Akanji A, Thalib L. Prevalence of the metabolic syndrome among female Kuwaiti adolescents using two different criteria. *British Journal of Nutrition*. 2010;103:77
22. The Effective Public Health Practice Project (EPHPP). Quality assessment tool for quantitative studies. Available from: <http://www.ephpp.ca/tools.html>
23. Moher D, Liberati A, Tetzlaff J, Altman DG, The PRISMA Group (2009). Preferred Reporting Items for Systematic Reviews and Meta-Analysis: The PRISMA Statement. *PLoS Med* 2009;6:e1000097.
24. Begg CB, Mazumdar M. Operating characteristics of a rank correlation test for publication bias. *Biometrics* 1994;50(4):1088-101.
25. Egger M, Smith GD, Schneider M, Minder C. Bias in meta-analysis detected by a simple. Graphical test. *BMJ* 1997;315(7109):629-34.

### Appendix 1: MEDLINE Search Strategy

1. pediatric obesity.mp. or exp Pediatric Obesity/
2. obesity in children.mp.
3. obesity.mp. or exp Obesity/ or exp Obesity, Morbid/
4. overweight.mp. or exp Overweight/
5. weight gain.mp. or exp Weight Gain/
6. (overweight or over weight or overeat\* or over eat\* or overfeed\* or over feed\*).ti,ab.
7. (weight adj1 gain\*).ti,ab.
8. obes\*.ti,ab.
9. exp Body Mass Index/ or body mass.mp.
10. (BMI or body mass index).ti,ab.
11. or/1-10
12. incidence.mp. or exp Incidence/
13. prevalence.mp. or exp Prevalence/
14. risk factors.mp. or exp Risk Factors/
15. (incidence or prevalence or epidemiol\$).ti.
16. epidemiologic methods.mp.
17. exp Epidemiologic Methods/
18. \*cohort studies/ or cohort.ti,ab.
19. (longitudinal or prospective).ti,ab.
20. \*case-control studies/
21. Control groups/ or control group\*.ti,ab.
22. Matched-pair analysis/
23. (case\* adj5 control\*).ti,ab.
24. (case\* adj3 comparison\*).ti,ab.
25. (case\* adj3 referen\*).mp.
26. (case\* adj1 base).mp.
27. (case\* adj1 cohort).mp.
28. exp cross-sectional studies/ or cross-sectional.ti,ab.
29. Controlled clinical trial.pt.
30. Randomized controlled trial.pt.
31. (random\$ or placebo\$ or single blind\$ or double blind\$ or triple blind\$).ti,ab.
32. Quasi-randomized Controlled Trial.mp.
33. (Controlled before and after).mp.
34. (Controlled before and after studies).mp.
35. Interrupted time series.mp.
36. Interrupted time series studies.mp.
37. or/12-36
38. Arab states of the Persian Gulf.mp.
39. Gulf Cooperation Council.mp.
40. Gulf countries.mp.
41. exp Saudi Arabia/ or Eastern Arabia.mp.
42. Kuwait.mp. or exp Kuwait/
43. Bahrain.mp. or exp Bahrain/
44. Oman.mp. or exp Oman/
45. Qatar.mp. or exp Qatar/
46. United Arab Emirates.mp. or exp United Arab Emirates/
47. or/38-46
48. 11 and 37 and 47

- 1  
2  
3 49. advertisements/ or animation/ or architectural drawings/ or bibliography/ or  
4 biography/ or book illustrations/ or bookplates/ or charts/ or comment/ or letter/ or  
5 editorial/ or news/ or patient education handout/ or published erratum/ or  
6 "retraction of publication"/  
7 50. 48 not 49  
8  
9  
10  
11  
12  
13  
14  
15  
16  
17  
18  
19  
20  
21  
22  
23  
24  
25  
26  
27  
28  
29  
30  
31  
32  
33  
34  
35  
36  
37  
38  
39  
40  
41  
42  
43  
44  
45  
46  
47  
48  
49  
50  
51  
52  
53  
54  
55  
56  
57  
58  
59  
60

For peer review only

1  
2  
3  
4  
5  
6  
7  
8  
9  
10  
11  
12  
13  
14  
15  
16  
17  
18  
19  
20  
21  
22  
23  
24  
25  
26  
27  
28  
29  
30  
31  
32  
33  
34  
35  
36  
37  
38  
39  
40  
41  
42  
43  
44  
45  
46  
47

PRISMA-P (Preferred Reporting Items for Systematic review and Meta-Analysis Protocols) 2015 checklist: recommended items to address in a systematic review protocol

Epidemiology of overweight and obesity in early childhood in the Gulf Cooperation Council countries: a systematic review and meta-analysis protocol

| <i>Section/topic</i>                                        | <i>#</i> | <i>Checklist item</i>                                                                                                                                                                           | <i>Reported on page #</i>  |
|-------------------------------------------------------------|----------|-------------------------------------------------------------------------------------------------------------------------------------------------------------------------------------------------|----------------------------|
| <b>ADMINISTRATIVE INFORMATION</b>                           |          |                                                                                                                                                                                                 |                            |
| Title<br>Identification<br>Update                           | 1a       | Identify the report as a protocol of a systematic review                                                                                                                                        | 1                          |
|                                                             | 1b       | If the protocol is for an update of a previous systematic review, identify as such                                                                                                              |                            |
| Registration                                                | 2        | If registered, provide the name of the registry (such as PROSPERO) and registration number                                                                                                      | PROSPERO<br>CRD42017073189 |
| Authors:<br>Contact<br>Contributions                        | 3a       | Provide name, institutional affiliation, e-mail address of all protocol authors; provide physical mailing address of corresponding author                                                       | 1<br>1, 7                  |
|                                                             | 3b       | Describe contributions of protocol authors and identify the guarantor of the review                                                                                                             |                            |
| Amendments                                                  | 4        | If the protocol represents an amendment of a previously completed or published protocol, identify as such and list changes; otherwise, state plan for documenting important protocol amendments | NA                         |
| Support:<br>Sources<br>Sponsor<br>Role of sponsor or funder | 5a       | Indicate sources of financial or other support for the review                                                                                                                                   | NA                         |
|                                                             | 5b       | Provide name for the review funder and/or sponsor                                                                                                                                               | NA                         |
|                                                             | 5c       | Describe roles of funder(s), sponsor(s), and/or institution(s), if any, in developing the protocol                                                                                              | NA                         |
| <b>INTRODUCTION</b>                                         |          |                                                                                                                                                                                                 |                            |
| Rationale                                                   | 6        | Describe the rationale for the review in the context of what is already known                                                                                                                   | 2                          |
| Objectives                                                  | 7        | Provide an explicit statement of the question(s) the review will address with reference to participants, interventions, comparators, and outcomes (PICO)                                        | 4                          |
| <b>METHODS</b>                                              |          |                                                                                                                                                                                                 |                            |

| <i>Section/topic</i>               | <i>#</i> | <i>Checklist item</i>                                                                                                                                                                                                                                     | <i>Reported on page #</i> |
|------------------------------------|----------|-----------------------------------------------------------------------------------------------------------------------------------------------------------------------------------------------------------------------------------------------------------|---------------------------|
| Eligibility criteria               | 8        | Specify the study characteristics (such as PICO, study design, setting, time frame) and report characteristics (such as years considered, language, publication status) to be used as criteria for eligibility for the review                             | 4,5                       |
| Information sources                | 9        | Describe all intended information sources (such as electronic databases, contact with study authors, trial registers or other grey literature sources) with planned dates of coverage                                                                     | 4-6                       |
| Search strategy                    | 10       | Present draft of search strategy to be used for at least one electronic database, including planned limits, such that it could be repeated                                                                                                                | 9,10                      |
| Study records:                     |          |                                                                                                                                                                                                                                                           |                           |
| Data management                    | 11a      | Describe the mechanism(s) that will be used to manage records and data throughout the review                                                                                                                                                              | 6                         |
| Selection process                  | 11b      | State the process that will be used for selecting studies (such as two independent reviewers) through each phase of the review (that is, screening, eligibility and inclusion in meta-analysis)                                                           | 5                         |
| Data collection process            | 11c      | Describe planned method of extracting data from reports (such as piloting forms, done independently, in duplicate), any processes for obtaining and confirming data from investigators                                                                    | 5                         |
| Data items                         | 12       | List and define all variables for which data will be sought (such as PICO items, funding sources), any pre-planned data assumptions and simplifications                                                                                                   | 4-6                       |
| Outcomes and prioritization        | 13       | List and define all outcomes for which data will be sought, including prioritization of main and additional outcomes, with rationale                                                                                                                      | 4                         |
| Risk of bias in individual studies | 14       | Describe anticipated methods for assessing risk of bias of individual studies, including whether this will be done at the outcome or study level, or both; state how this information will be used in data synthesis                                      | 5                         |
| Data synthesis                     | 15a      | Describe criteria under which study data will be quantitatively synthesised                                                                                                                                                                               | 5,6                       |
|                                    | 15b      | If data are appropriate for quantitative synthesis, describe planned summary measures, methods of handling data and methods of combining data from studies, including any planned exploration of consistency (such as I <sup>2</sup> , Kendall's $\tau$ ) | 6                         |
|                                    | 15c      | Describe any proposed additional analyses (such as sensitivity or subgroup analyses, meta-regression)                                                                                                                                                     | 6                         |
|                                    | 15d      | If quantitative synthesis is not appropriate, describe the type of summary planned                                                                                                                                                                        | 6                         |
| Meta-bias(es)                      | 16       | Specify any planned assessment of meta-bias(es) (such as publication bias across studies, selective reporting within studies)                                                                                                                             | 6                         |
| Confidence in cumulative evidence  | 17       | Describe how the strength of the body of evidence will be assessed (such as GRADE)                                                                                                                                                                        | 4-6                       |

# BMJ Open

## Epidemiology of overweight and obesity in early childhood in the Gulf Cooperation Council countries: a systematic review and meta-analysis protocol

|                                 |                                                                                                                                                                                                                                                                                                                                                                                                                                                                                                                                     |
|---------------------------------|-------------------------------------------------------------------------------------------------------------------------------------------------------------------------------------------------------------------------------------------------------------------------------------------------------------------------------------------------------------------------------------------------------------------------------------------------------------------------------------------------------------------------------------|
| Journal:                        | <i>BMJ Open</i>                                                                                                                                                                                                                                                                                                                                                                                                                                                                                                                     |
| Manuscript ID                   | bmjopen-2017-019363.R1                                                                                                                                                                                                                                                                                                                                                                                                                                                                                                              |
| Article Type:                   | Protocol                                                                                                                                                                                                                                                                                                                                                                                                                                                                                                                            |
| Date Submitted by the Author:   | 24-Nov-2017                                                                                                                                                                                                                                                                                                                                                                                                                                                                                                                         |
| Complete List of Authors:       | Nahas, Mahmoud; Ministry of Health, Kingdom of Saudi Arabia, School Health<br>Asamoah, Felix ; Queen Mary, University of London; NHSI England, UK<br>Mullen, Stephen ; Paediatric Emergency Department, University Hospitals of Wales<br>Nwaru, Bright; Krefting Research Centre, Institute of Medicine, University of Gothenburg, Sweden; Usher Institute of Population Health Sciences and Informatics, The University of Edinburgh<br>Nurmatov, Ulugbek; Division of Population Medicine, School of Medicine, Cardiff University |
| <b>Primary Subject Heading</b>: | Public health                                                                                                                                                                                                                                                                                                                                                                                                                                                                                                                       |
| Secondary Subject Heading:      | Epidemiology, Evidence based practice, Public health                                                                                                                                                                                                                                                                                                                                                                                                                                                                                |
| Keywords:                       | EPIDEMIOLOGY, systematic review, Obesity                                                                                                                                                                                                                                                                                                                                                                                                                                                                                            |
|                                 |                                                                                                                                                                                                                                                                                                                                                                                                                                                                                                                                     |

SCHOLARONE™  
Manuscripts

1  
2  
3 **Epidemiology of overweight and obesity in early childhood in the Gulf Cooperation Council**  
4 **countries: a systematic review and meta-analysis protocol**  
5  
6

7 Mahmoud Nahhas,<sup>1</sup> Felix Asamoah,<sup>2-3</sup> Stephen Mullen,<sup>4</sup> Bright I Nwaru,<sup>5,6</sup> Ulugbek  
8 Nurmatov<sup>7</sup>  
9

10  
11 <sup>1</sup>Ministry of Health, Riyadh, The Kingdom of Saudi Arabia

12 <sup>2</sup>School of Medicine and Dentistry, Queen Mary, University of London, UK;

13 <sup>3</sup>NHSI England, UK

14 <sup>4</sup>Paediatric Emergency Department, University Hospitals of Wales, UK

15 <sup>5</sup>Krefting Research Centre, Institute of Medicine, University of Gothenburg, Sweden

16 <sup>6</sup>Usher Institute of Population Health Sciences and Informatics, The University of Edinburgh,  
17  
18  
19  
20  
21 UK

22 <sup>7</sup>Division of Population Medicine, School of Medicine, Cardiff University, Wales, UK  
23  
24  
25  
26  
27  
28  
29  
30  
31  
32  
33  
34  
35  
36  
37  
38  
39  
40  
41  
42  
43  
44  
45  
46  
47  
48  
49

Correspondence to:

Dr. Mahmoud Nahhas; [Manahas@moh.gov.sa](mailto:Manahas@moh.gov.sa)

Director General of School Health Department, Ministry of Health, Kingdom of Saudi Arabia

Riyadh, 11176

Phone: +966 112124624  
50

**Keywords**

51 Obesity, children, early years, epidemiology, risk factors, the Gulf Cooperation Council (GCC)  
52 countries, systematic review  
53  
54  
55  
56  
57  
58  
59  
60



**ABSTRACT**

**Introduction:** There has been a notable increase in the prevalence of overweight and obesity in school-aged children in many industrialised regions. The worldwide prevalence of childhood overweight and obesity increased from 4.2% in 1990 to 6.7% in 2010. Although many studies have been published, the epidemiological burden of overweight and obesity in the Gulf Cooperation Council (GCC) countries (Bahrain, Kuwait, Oman, Qatar, Saudi Arabia, and the United Arab Emirates) is unclear. There is a need to bring together and appraise relevant studies in order to estimate the epidemiological burden (including incidence, prevalence, risk factors, trend over time) of overweight and obesity in this region and thus help to inform national and regional policies.

**Methods and analysis:** We will conduct a systematic review and meta-analysis on the epidemiology of overweight and obesity in early childhood including incidence, prevalence, risk factors and trends over time in the GCC countries. We will search international electronic databases for published, unpublished and in-progress epidemiological studies of interest published from inception to 2017. In addition, we will contact an international panel of experts on the topic. There will be no restriction on the language of publication of studies. We will use the Effective Public Health Practice Project (EPHPP) to appraise the methodological quality of included studies. Meta-analysis will be undertaken using random effects models.

**Ethics and dissemination:** Ethical approval is not required. The outcome of the review will be disseminated through conference presentations and peer-reviewed journal publication.

**Protocol registration number:** International Prospective Register for Systematic Reviews (PROSPERO) number CRD42017073189

**Strengths and limitations of this study:**

- This systematic review will for the first time provide estimates of the epidemiological burden of overweight and obesity in early childhood across the GCC region and within each nation
- Understanding the burden of overweight and obesity during the early years will help to formulate and strengthen national family and school policies for children in this age group in the GCC region.
- Whilst this study will provide a comprehensive overview of the burden of overweight and obesity in the GCC region, we anticipate disparities across available studies, and this will be taken into account in our interpretation of the underlying evidence.

## INTRODUCTION

Childhood overweight and obesity is a global health problem, impacting the physical and psychological health of individuals for the duration of their life.<sup>1-5</sup> Childhood overweight and obesity strongly correlate with adult obesity, which is linked to an increased risk of morbidity and mortality.<sup>6,7</sup> Overweight or obese children have an increased risk of heart disease, diabetes and other health problems in adulthood.<sup>2</sup> The impact is not limited to the individual but carries a significant economic burden.<sup>8</sup> This is partially due to increased spending on healthcare with a German study estimating the excess lifetime cost of childhood overweight and obesity in the German population at €145 billion.<sup>9</sup>

According to the World Health Organisation (WHO), 43 million children (35 million from developing countries) were estimated to be overweight and obese in 2010, while 92 million worldwide were at risk of being overweight.<sup>10</sup> In the same report, the worldwide prevalence of childhood overweight and obesity combined increased from 4.2% (95% CI: 3.2% to 5.2%) in 1990 to 6.7% (95% CI: 5.6% to 7.7%) in 2010. This trend is expected to reach 9.1% (95% CI: 7.3%, 10.9%) or affect 60 million children by 2020.<sup>10</sup>

The prevalence of childhood obesity is high among Gulf Cooperation Council (GCC) countries (Bahrain, Kuwait, Oman, Qatar, Saudi Arabia, and the United Arab Emirates), with the prevalence of obesity among pre-school children estimated to be between 8% to 9%.<sup>11</sup> In Kuwait, for instance, 40-49% of adolescents are obese.<sup>11</sup> Kuwait ranks among the top 7% of countries worldwide in reference to adult obesity prevalence,<sup>1,12</sup> and is among the top 3% of countries with the highest prevalence of diabetes.<sup>13</sup> The recognition of childhood overweight and obesity and the long-term consequences, has made it a high priority for health authorities in the GCC countries<sup>14,15</sup> and globally.<sup>1,16</sup>

Currently there is paucity of robust epidemiological data on childhood overweight and obesity in the GCC countries. A number of studies suggest that trends in childhood overweight and obesity in GCC countries may be increasing.<sup>17-21</sup> However, despite several studies that have been published the epidemiological burden of overweight or obesity in the GCC is currently unclear. Given differences in population structure, culture and lifestyle habits, education, occupation, the risk factors for obesity may vary from population to

1  
2  
3 population, hence risk factors may differ between the GCC countries and western  
4 countries.<sup>22</sup> There is a need to bring together the relevant available evidence and synthesise  
5 them in order to derive relevant epidemiological parameters (including incidence,  
6 prevalence, risk factors, trend over time) that will help to describe current burden of  
7 overweight and obesity in the GCC region. This will help to formulate or strengthen existing  
8 regional and national policies around obesity, particularly in relation to school and early  
9 years nutrition and lifestyle.  
10  
11  
12  
13

14  
15 The early childhood concept model and framework has been developed in several countries.  
16 <sup>23,24</sup> Obesity can occur early in life with the prenatal and early childhood periods crucial for  
17 child growth and development. <sup>25,26</sup> In addition, important and powerful obesity risk factors  
18 can be identified within the first 1000 days of early life, from conception to 24 months.<sup>3</sup>  
19 Preventing the causes and consequences of childhood obesity, avoiding transition of obesity  
20 from early childhood to adulthood and altering early life systems promise the interruption of  
21 the continuing vicious cycle of the childhood obesity epidemic worldwide.<sup>27</sup>  
22  
23  
24  
25  
26  
27

28 We plan to undertake a systematic review to identify, appraise and synthesise all available  
29 evidence on the epidemiology of overweight and obesity in children during the early years of  
30 life in the GCC region. Specifically, by bringing together all relevant published evidence, this  
31 systematic review aims to provide reliable and contemporaneous estimates of the incidence,  
32 prevalence, time trends, risk factors for childhood overweight and obesity in GCC countries  
33 in children during the early life years. The focus on the early years of childhood is to identify  
34 early dominant factors that may in the long-term help in formulating evidence-based  
35 policies for early interventions.  
36  
37  
38  
39  
40  
41

## 42 **METHODS AND ANALYSES**

### 43 **Types of studies**

44  
45 We will include all interventional (randomised controlled trials, controlled before and after  
46 studies, and interrupted time series studies) and observational (cohort, case control, and  
47 cross-sectional studies) studies. The main source of data on the incidence and prevalence of  
48 obesity will come from cohort and cross-sectional studies, respectively. We will include  
49 interventional and case-control studies, as these will additionally provide data on risk factors  
50 for obesity. Reviews, case studies and case series, and animal studies will be excluded.  
51  
52  
53  
54  
55  
56  
57

## Participants

The participants will include all children in their early years (up to the child's 8th birthday). We will include and extract data only for children aged under 8 years old. If there are aggregated data and no sub-group analysis for children aged up to 8 years old we will exclude those papers.

## Outcome measures

*Primary outcomes:* Our primary outcomes will include objectively defined measures of the incidence and prevalence of overweight and obesity, time trends in children aged up to 8 years old in GCC countries. For consistency, we will use the standard, validated WHO definition of overweight and obesity in children based on body mass index (BMI) measurements.

*Secondary outcomes:* Secondary outcomes will include risk factors of overweight and obesity in children aged up to 8 years old in GCC countries.

## Search methods

We will employ a highly sensitive search strategy to retrieve articles meeting the review criteria. We will include studies from 2000 onwards to capture current and strong evidence in this SR. Appendix 1 contains the search strategies developed for MEDLINE database interface, which we will adapt to search other databases. Databases to search will include MEDLINE, EMBASE, Cochrane Library, ISI Web of Science, CINAHL, Google Scholar, AMED, Psych INFO, CAB International, and WHO Global Health Library. Additional references will be located through searching the references cited in identified papers, as well as searching databases of the proceedings of international conferences, such as ISI Conference Proceedings Citation Index and ZETOC (British Library). For unpublished and ongoing studies, we will contact international experts in the field of research. There will be no language restrictions, and where possible we will translate literature in languages other than English and report any literature we are unable to translate.

## Study selection

1  
2  
3 Duplicate papers will be removed first before undertaking the screening. If there are  
4 multiple publications from the same population, we will use the main comprehensive paper  
5 that incorporates all relevant outcomes that meet our inclusion criteria. Two reviewers will  
6 independently check titles and abstracts of the retrieved articles according to the review  
7 criteria; any discrepancies will be resolved by consensus and a third reviewer will arbitrate  
8 disagreements. Full text copies of potentially relevant studies will be obtained and their  
9 eligibility for inclusion independently assessed by two reviewers; discrepancies will be  
10 resolved by consensus and disagreements will be arbitrated by a third reviewer.  
11  
12  
13  
14  
15

### 16 17 **Quality assessment and analysis**

18 Two reviewers (UN and FA; MN and SM) will independently appraise the quality of eligible  
19 studies and assess the potential for risk of bias; any discrepancies will be resolved by  
20 discussion or arbitration by a third reviewer (BN) in the event of any disagreement. We will  
21 also calculate the Kappa test a measure of the agreement between the reviewers regarding  
22 the quality of the studies. The methodological quality of intervention studies will be  
23 assessed following the recommendations of the Cochrane Effective Practice and  
24 Organization of Care Group.<sup>28</sup>

25 We will assess the methodological quality of observational studies by using the Effective  
26 Public Health Practice Project (EPHPP).<sup>29</sup> We will focus on the following domains to assess  
27 the quality of included studies: selection bias; study design; confounders; blinding; data  
28 collection method; withdrawals and dropouts; and final global rating. Each component-  
29 specific parameter (i.e. suitability of the study design for the research question; risk of  
30 selection bias; exposure measurement; outcome assessment; and generalizability of  
31 findings) will be given a judgement: “strong”; “moderate”; and “weak”. At the end of critical  
32 appraisal, we will also provide the overall grading for each study.  
33  
34  
35  
36  
37  
38  
39  
40  
41  
42  
43

### 44 **Data extraction and reporting**

45 Two reviewers will independently extract relevant information and study data onto a  
46 customized data extraction sheet (Appendix 2). Any discrepancies in data extraction will be  
47 resolved by discussion or arbitration by a third reviewer if agreement cannot be reached.  
48 Descriptive tables will be used to summarize the literature and characteristics of studies  
49 contributing to the overall evidence. We will employ the PRISMA checklist to guide the  
50 reporting of the review.<sup>30</sup>  
51  
52  
53  
54  
55  
56  
57  
58  
59  
60

### Data analysis

If studies deem to be reasonably clinically and methodologically homogenous, we will pool data statistically and conduct meta-analyses. Quantitative combination of the estimates will be done separately for the review outcomes: i.e. separately for prevalence, incidence, risk factors, and trend. Where applicable and feasible, we will convert between estimates in order to derive common estimates that will allow implementation of the meta-analysis. If the data is heterogeneous we will undertake a narrative synthesis of the data. We will quantify the heterogeneity between studies using the  $I^2$  statistic. Where possible, we will conduct a subgroup analysis for overweight and obesity outcomes based on sex, age group, study design, and country. We will perform sensitivity analyses based on risk of bias in the studies. We will assess evidence of publication bias using Funnel plots and statistically using Begg and Egger tests.<sup>31,32</sup> The meta-analyses will be performed using Comprehensive Meta-analysis, version 3.

### Protocol registration

A detailed protocol for the review has been registered with the International Prospective Register of Systematic Reviews (PROSPERO CRD42017073189): <http://www.crd.york.ac.uk/prospero/> prior to commencing the review.

### DISCUSSION

The current review will present the first comprehensive synthesis of the evidence relating the incidence, prevalence, time trends, and risk of obesity in children in the early years up to 8 years old in GCC countries. Our preliminary searches could not find any systematic reviews on this topic.

### CONCLUSION

Evidence generation and synthesis on up to date estimates of the incidence, prevalence, time trends, and risk factors of obesity/overweight in children in GCC countries will help to develop interventions for overweight or obese children. Furthermore, a comprehensive synthesis of the evidence base will provide the opportunity to create evidence-informed policies in these GCC countries in the prevention of obesity and overweight among children in the early years.

1  
2  
3 **Acknowledgements:** We thank the Ministry of Health of Saudi Arabia for retrieving  
4 unobtainable papers.  
5

6  
7 **Contributors:** UBN and MN conceived the idea for this study. UBN, BIN and FA developed  
8 the methods and together with SM and MN drafted this protocol. MN, UN, FA, SM will  
9 extract data, appraisal of papers, UN will conduct meta-analyses, draft a manuscript and all  
10 authors will contribute to the final synthesis of evidence.  
11  
12  
13

14  
15 **Competing of interests:** The authors declare no competing interest related to this work.  
16

17 **Funding:** None  
18  
19  
20  
21  
22  
23  
24  
25  
26  
27  
28  
29  
30  
31  
32  
33  
34  
35  
36  
37  
38  
39  
40  
41  
42  
43  
44  
45  
46  
47  
48  
49  
50  
51  
52  
53  
54  
55  
56  
57  
58  
59  
60

## REFERENCES

1. World Health Organisation. 2015. Childhood overweight and obesity report. Report of a WHO Consultation. WHO Technical Report Series, No. 894. Geneva: World Health Organisation. Assessed: <http://www.who.int/dietphysicalactivity/childhood/en/>
2. Sabin MA, Kao KT, Juonala M, Baur LA, Wake M. Viewpoint article : Childhood obesity – looking back over 50 years to begin to look forward. *Journal of Paediatrics and Child Health*. 2015;51:82-86.
3. Mameli C, Mazzantini S, Zuccotti GV. Nutrition in the first 1000 days: the origin of childhood obesity. *Int J Environ Res Public Health*. 2016;13:838.
4. El-Bayoumy I, Shady I, Lotfy H. Prevalence of obesity among adolescents (10–14 years) in Kuwait. *Asia-Pacific Journal of Public Health*. 2009;21:153-9.
5. Abdulrazzaq Y, Nagelkerke N, Mousa M. UAE population reference standard charts for body mass index and skinfold thickness, at ages 0–18 years. *International Journal of Food Sciences and Nutrition*. 2011;62:692-702.
6. Caliskan A, Atak N. A general review of childhood obesity. *TAF Prev Med Bull*. 2013;12(5):571-582.
7. Xu S, Xue Y. Pediatric obesity: causes, symptoms, prevention and treatment. *Exp Ther Med* 2016;11:15-20.
8. Tremmel M, Gerdtham Ulf-G, Nilsson PM, Saha S. Economic Burden of obesity: a systematic review. *Int J Environ Res Public Health*. 2017;14:435.
9. Sonntag D, Ali S, De Bock F. Lifetime indirect cost of childhood overweight and obesity: a decision analytic model. *Obesity* 2016;24:200-206.
10. De Onis M, Blossner M, Borghi E. Global prevalence and trends of overweight and obesity among preschool children. *Am J Clin Nutr* 2010;92(5):1257-64.
11. Ng SW, Zaghoul, Ali HI, Harrison G, Popkin BM. The prevalence and trends of overweight, obesity and nutrition-related non-communicable diseases in the Arabian Gulf States. *Obesity Reviews*. 2011;12:1-13.
12. WHO, "Global info base international comparisons," 2011, Available at: <https://apps.who.int/infobase/Comparisons.aspx>
13. Mousa M, Alsaedis M, Abdella N, Refaid S, Shelike N, Gomez E. Prevalence of type 2 diabetes mellitus among Kuwaiti children and adolescents. *Medical Principles and Practice*. 2008;270-5.
14. Padmakumar Ram. Management of Healthcare in the Gulf Cooperation Council (GCC) countries with special reference to Saudi Arabia. *International Journal of Academic Research in Business and Social Sciences*. 2014;4(12):24-41.
15. Amin TT, Al Sultan AI, Ayub A. Overweight and obesity and their relation to dietary habits and socio demographic characteristics among male primary school children in Al Hassa, Kingdom of Saudi Arabia. *Eur J Nutr* 2008;47(6):310-8.
16. Ogden CL, Carroll MD, Kit BK, Flegal KM. Prevalence of Childhood and Adult Obesity in the United States, 2011-2012. *JAMA*. 2014;311(8):806-814.
17. Mirmiran P, Sherafat-Kazemzadeh R, Jalali-Farahani S, Azizi F. Childhood obesity in the Middle East: a review. *Eastern Mediterranean Health Journal*. 2010;16:1009-17



18. Malik M, Bakir A. Prevalence of overweight and obesity among children in the United Arab Emirates. *Obesity Reviews*. 2006;8:15-20.
19. Al-Sendi A, Shetty P, Musaiger A. Prevalence of overweight and obesity among Bahraini adolescents: a comparison between three different sets of criteria. *European Journal of Clinical Nutrition*. 2003;57:471-4.
20. Eapen V, Mabrouk A, Yousef S. Metabolic syndrome among young obese in the United Arab Emirates. *Journal of Tropical Pediatrics*. 2010;56:325-8.
21. Al-Isa A, Akanji A, Thalib L. Prevalence of the metabolic syndrome among female Kuwaiti adolescents using two different criteria. *British Journal of Nutrition*. 2010;103:77
22. Wang L, Southerland J, Wang K, et al., Ethnic differences in risk factors for obesity among adults in California, the United States. *Journal of Obesity*. 2017; Hindawi, <https://doi.org/101155/2017/2427483>.
23. Available at: <http://gov.wales/topics/people-and-communities/people/children-and-young-people/early-years/?lang=en>
24. Available at: <http://www.gov.scot/Resource/Doc/257007/0076309.pdf>
25. Vine M, Hargreaves MB, Briefel RR, Orfield C. Expanding the role of primary care in the prevention and treatment of childhood obesity: a review of clinic- and community-based recommendations and interventions. *Journal of Obesity* 2013;17
26. Pandita A, Sharma D, Pandita D, Pawar S, Tariq M, Kaul A. Childhood obesity: prevention is better than cure. *Diabetes, Metabolic Syndrome and Obesity: Targets and Therapy* 2016;9:83-89
27. Nader PR, Huang T, Gahagan S, Kumanyika S, Hammond RA, Christoffel KK. Next steps in obesity prevention: altering early life systems to support healthy parents, infants, and toddlers. *Childhood obesity*. 2012;8(3):195-204.
28. Higgins JPT, Green S eds. *Cochrane Handbook for Systematic Reviews of Interventions* Version 5.1.0. The Cochrane Collaboration 2011. Available: <http://www.cochrane.org/training/cochrane-handbook>. Accessed: 9 October 2017.
29. The Effective Public Health Practice Project (EPHPP). Quality assessment tool for quantitative studies. Available from: <http://www.ephpp.ca/tools.html>
30. Moher D, Liberati A, Tetzlaff J, Altman DG, The PRISMA Group (2009). Preferred Reporting Items for Systematic Reviews and Meta-Analysis: The PRISMA Statement. *PLoS Med* 2009;6:e1000097.
31. Begg CB, Mazumdar M. Operating characteristics of a rank correlation test for publication bias. *Biometrics* 1994;50(4):1088-101.
32. Egger M, Smith GD, Schneider M, Minder C. Bias in meta-analysis detected by a simple. Graphical test. *BMJ* 1997;315(7109):629-34.

### Appendix 1: MEDLINE Search Strategy

1. pediatric obesity.mp. or exp Pediatric Obesity/
2. obesity in children.mp.
3. obesity.mp. or exp Obesity/ or exp Obesity, Morbid/
4. overweight.mp. or exp Overweight/
5. weight gain.mp. or exp Weight Gain/
6. (overweight or over weight or overeat\* or over eat\* or overfeed\* or over feed\*).ti,ab.
7. (weight adj1 gain\*).ti,ab.
8. obes\*.ti,ab.
9. exp Body Mass Index/ or body mass.mp.
10. (BMI or body mass index).ti,ab.
11. or/1-10
12. incidence.mp. or exp Incidence/
13. prevalence.mp. or exp Prevalence/
14. risk factors.mp. or exp Risk Factors/
15. (incidence or prevalence or epidemiol\$).ti.
16. epidemiologic methods.mp.
17. exp Epidemiologic Methods/
18. \*cohort studies/ or cohort.ti,ab.
19. (longitudinal or prospective).ti,ab.
20. \*case-control studies/
21. Control groups/ or control group\*.ti,ab.
22. Matched-pair analysis/
23. (case\* adj5 control\*).ti,ab.
24. (case\* adj3 comparison\*).ti,ab.
25. (case\* adj3 referen\*).mp.
26. (case\* adj1 base).mp.
27. (case\* adj1 cohort).mp.
28. exp cross-sectional studies/ or cross-sectional.ti,ab.
29. Controlled clinical trial.pt.
30. Randomized controlled trial.pt.
31. (random\$ or placebo\$ or single blind\$ or double blind\$ or triple blind\$).ti,ab.
32. Quasi-randomized Controlled Trial.mp.
33. (Controlled before and after).mp.
34. (Controlled before and after studies).mp.
35. Interrupted time series.mp.
36. Interrupted time series studies.mp.
37. or/12-36
38. Arab states of the Persian Gulf.mp.
39. Gulf Cooperation Council.mp.
40. Gulf countries.mp.
41. exp Saudi Arabia/ or Eastern Arabia.mp.
42. Kuwait.mp. or exp Kuwait/
43. Bahrain.mp. or exp Bahrain/
44. Oman.mp. or exp Oman/
45. Qatar.mp. or exp Qatar/
46. United Arab Emirates.mp. or exp United Arab Emirates/

- 1  
2  
3 47. or/38-46  
4 48. 11 and 37 and 47  
5 49. advertisements/ or animation/ or architectural drawings/ or bibliography/ or biography/  
6 or book illustrations/ or bookplates/ or charts/ or comment/ or letter/ or editorial/ or news/ or  
7 patient education handout/ or published erratum/ or "retraction of publication"/  
8 50. 48 not 49  
9  
10  
11  
12  
13  
14  
15  
16  
17  
18  
19  
20  
21  
22  
23  
24  
25  
26  
27  
28  
29  
30  
31  
32  
33  
34  
35  
36  
37  
38  
39  
40  
41  
42  
43  
44  
45  
46  
47  
48  
49  
50  
51  
52  
53  
54  
55  
56  
57  
58  
59  
60

For peer review only

1  
2  
3  
4  
5  
6  
7  
8  
9  
10  
11  
12  
13  
14  
15  
16  
17  
18  
19  
20  
21  
22  
23  
24  
25  
26  
27  
28  
29  
30  
31  
32  
33  
34  
35  
36  
37  
38  
39  
40  
41  
42  
43  
44  
45  
46  
47

**Appendix 2**

**Table 1 Summary of evidence on the prevalence/incidence, risk/prognostic factors for obesity in GCC countries**

| Author, year, country | Age range | Prevalence/incidence |         | Outcomes | Factors studied |                    | Statistical analysis method | Results and comments |
|-----------------------|-----------|----------------------|---------|----------|-----------------|--------------------|-----------------------------|----------------------|
|                       |           | Overweight           | Obesity |          | Risk factors    | Prognostic factors |                             |                      |
|                       |           |                      |         |          |                 |                    |                             |                      |

**Table E1: The main features, main results of incidence and prevalence of obesity, and overall risk of bias assessment on the studies included in the systematic review on the epidemiology of obesity in GCC countries**

| Author, year, country | Study design | Inclusion/exclusion criteria | Study population<br>N, source of study population |                     | Outcome assessment and definition |                    | Occurrence measure(s) | Main results of the incidence or prevalence of obesity<br>Percentage (95% CI) | Overall risk of bias assessment |
|-----------------------|--------------|------------------------------|---------------------------------------------------|---------------------|-----------------------------------|--------------------|-----------------------|-------------------------------------------------------------------------------|---------------------------------|
|                       |              |                              | Number approached                                 | Number participated | Outcome assessment                | Outcome definition |                       |                                                                               |                                 |
|                       |              |                              |                                                   |                     |                                   |                    |                       |                                                                               |                                 |

**Table E2: Critical appraisal of included observational studies assessed by the Effective Public Health Practice Project (EPHPP)**

| Study, year | Design | Selection Bias |   |   | Study Design |   |   | Confounders |   |   | Blinding |   |   | Data Collection Method |   |   | Withdrawals and Dropouts |   |   | Global Rating |   |   |  |  |  |
|-------------|--------|----------------|---|---|--------------|---|---|-------------|---|---|----------|---|---|------------------------|---|---|--------------------------|---|---|---------------|---|---|--|--|--|
|             |        | S              | M | W | S            | M | W | S           | M | W | S        | M | W | S                      | M | W | S                        | M | W | S             | M | W |  |  |  |
|             |        |                |   |   |              |   |   |             |   |   |          |   |   |                        |   |   |                          |   |   |               |   |   |  |  |  |

Abbreviations:

- S Strong
- M Moderate
- W Weak
- NA Not applicable

PRISMA-P (Preferred Reporting Items for Systematic review and Meta-Analysis Protocols) 2015 checklist: recommended items to address in a systematic review protocol

Epidemiology of overweight and obesity in early childhood in the Gulf Cooperation Council countries: a systematic review and meta-analysis protocol

| <i>Section/topic</i>              | <i>#</i> | <i>Checklist item</i>                                                                                                                                                                           | <i>Reported on page #</i>  |
|-----------------------------------|----------|-------------------------------------------------------------------------------------------------------------------------------------------------------------------------------------------------|----------------------------|
| <b>ADMINISTRATIVE INFORMATION</b> |          |                                                                                                                                                                                                 |                            |
| Title                             |          |                                                                                                                                                                                                 |                            |
| Identification                    | 1a       | Identify the report as a protocol of a systematic review                                                                                                                                        | 1                          |
| Update                            | 1b       | If the protocol is for an update of a previous systematic review, identify as such                                                                                                              |                            |
| Registration                      | 2        | If registered, provide the name of the registry (such as PROSPERO) and registration number                                                                                                      | PROSPERO<br>CRD42017073189 |
| Authors:                          |          |                                                                                                                                                                                                 |                            |
| Contact                           | 3a       | Provide name, institutional affiliation, e-mail address of all protocol authors; provide physical mailing address of corresponding author                                                       | 1                          |
| Contributions                     | 3b       | Describe contributions of protocol authors and identify the guarantor of the review                                                                                                             | 1, 7                       |
| Amendments                        | 4        | If the protocol represents an amendment of a previously completed or published protocol, identify as such and list changes; otherwise, state plan for documenting important protocol amendments | NA                         |
| Support:                          |          |                                                                                                                                                                                                 |                            |
| Sources                           | 5a       | Indicate sources of financial or other support for the review                                                                                                                                   | NA                         |
| Sponsor                           | 5b       | Provide name for the review funder and/or sponsor                                                                                                                                               | NA                         |
| Role of sponsor or funder         | 5c       | Describe roles of funder(s), sponsor(s), and/or institution(s), if any, in developing the protocol                                                                                              | NA                         |
| <b>INTRODUCTION</b>               |          |                                                                                                                                                                                                 |                            |
| Rationale                         | 6        | Describe the rationale for the review in the context of what is already known                                                                                                                   | 2                          |
| Objectives                        | 7        | Provide an explicit statement of the question(s) the review will address with reference to participants, interventions, comparators, and outcomes (PICO)                                        | 4                          |
| <b>METHODS</b>                    |          |                                                                                                                                                                                                 |                            |

| <i>Section/topic</i>               | <i>#</i> | <i>Checklist item</i>                                                                                                                                                                                                                                     | <i>Reported on page #</i> |
|------------------------------------|----------|-----------------------------------------------------------------------------------------------------------------------------------------------------------------------------------------------------------------------------------------------------------|---------------------------|
| Eligibility criteria               | 8        | Specify the study characteristics (such as PICO, study design, setting, time frame) and report characteristics (such as years considered, language, publication status) to be used as criteria for eligibility for the review                             | 4,5                       |
| Information sources                | 9        | Describe all intended information sources (such as electronic databases, contact with study authors, trial registers or other grey literature sources) with planned dates of coverage                                                                     | 4-6                       |
| Search strategy                    | 10       | Present draft of search strategy to be used for at least one electronic database, including planned limits, such that it could be repeated                                                                                                                | 9,10                      |
| Study records:                     |          |                                                                                                                                                                                                                                                           |                           |
| Data management                    | 11a      | Describe the mechanism(s) that will be used to manage records and data throughout the review                                                                                                                                                              | 6                         |
| Selection process                  | 11b      | State the process that will be used for selecting studies (such as two independent reviewers) through each phase of the review (that is, screening, eligibility and inclusion in meta-analysis)                                                           | 5                         |
| Data collection process            | 11c      | Describe planned method of extracting data from reports (such as piloting forms, done independently, in duplicate), any processes for obtaining and confirming data from investigators                                                                    | 5                         |
| Data items                         | 12       | List and define all variables for which data will be sought (such as PICO items, funding sources), any pre-planned data assumptions and simplifications                                                                                                   | 4-6                       |
| Outcomes and prioritization        | 13       | List and define all outcomes for which data will be sought, including prioritization of main and additional outcomes, with rationale                                                                                                                      | 4                         |
| Risk of bias in individual studies | 14       | Describe anticipated methods for assessing risk of bias of individual studies, including whether this will be done at the outcome or study level, or both; state how this information will be used in data synthesis                                      | 5                         |
| Data synthesis                     | 15a      | Describe criteria under which study data will be quantitatively synthesised                                                                                                                                                                               | 5,6                       |
|                                    | 15b      | If data are appropriate for quantitative synthesis, describe planned summary measures, methods of handling data and methods of combining data from studies, including any planned exploration of consistency (such as I <sup>2</sup> , Kendall's $\tau$ ) | 6                         |
|                                    | 15c      | Describe any proposed additional analyses (such as sensitivity or subgroup analyses, meta-regression)                                                                                                                                                     | 6                         |
|                                    | 15d      | If quantitative synthesis is not appropriate, describe the type of summary planned                                                                                                                                                                        | 6                         |
| Meta-bias(es)                      | 16       | Specify any planned assessment of meta-bias(es) (such as publication bias across studies, selective reporting within studies)                                                                                                                             | 6                         |
| Confidence in cumulative evidence  | 17       | Describe how the strength of the body of evidence will be assessed (such as GRADE)                                                                                                                                                                        | 4-6                       |

# BMJ Open

## Epidemiology of overweight and obesity in early childhood in the Gulf Cooperation Council countries: a systematic review and meta-analysis protocol

|                                 |                                                                                                                                                                                                                                                                                                                                                                                                                                                                                                                                     |
|---------------------------------|-------------------------------------------------------------------------------------------------------------------------------------------------------------------------------------------------------------------------------------------------------------------------------------------------------------------------------------------------------------------------------------------------------------------------------------------------------------------------------------------------------------------------------------|
| Journal:                        | <i>BMJ Open</i>                                                                                                                                                                                                                                                                                                                                                                                                                                                                                                                     |
| Manuscript ID                   | bmjopen-2017-019363.R2                                                                                                                                                                                                                                                                                                                                                                                                                                                                                                              |
| Article Type:                   | Protocol                                                                                                                                                                                                                                                                                                                                                                                                                                                                                                                            |
| Date Submitted by the Author:   | 16-Feb-2018                                                                                                                                                                                                                                                                                                                                                                                                                                                                                                                         |
| Complete List of Authors:       | Nahas, Mahmoud; Ministry of Health, Kingdom of Saudi Arabia, School Health<br>Asamoah, Felix ; Queen Mary, University of London; NHSI England, UK<br>Mullen, Stephen ; Paediatric Emergency Department, University Hospitals of Wales<br>Nwaru, Bright; Krefting Research Centre, Institute of Medicine, University of Gothenburg, Sweden; Usher Institute of Population Health Sciences and Informatics, The University of Edinburgh<br>Nurmatov, Ulugbek; Division of Population Medicine, School of Medicine, Cardiff University |
| <b>Primary Subject Heading</b>: | Public health                                                                                                                                                                                                                                                                                                                                                                                                                                                                                                                       |
| Secondary Subject Heading:      | Epidemiology, Evidence based practice, Public health                                                                                                                                                                                                                                                                                                                                                                                                                                                                                |
| Keywords:                       | EPIDEMIOLOGY, systematic review, Obesity                                                                                                                                                                                                                                                                                                                                                                                                                                                                                            |
|                                 |                                                                                                                                                                                                                                                                                                                                                                                                                                                                                                                                     |

SCHOLARONE™  
Manuscripts

1  
2  
3 **Epidemiology of overweight and obesity in early childhood in the Gulf Cooperation Council**  
4 **countries: a systematic review and meta-analysis protocol**  
5

6  
7 Mahmoud Nahhas,<sup>1</sup> Felix Asamoah,<sup>2-3</sup> Stephen Mullen,<sup>4</sup> Bright I Nwaru,<sup>5,6</sup> Ulugbek  
8 Nurmatov<sup>7</sup>  
9

10  
11 <sup>1</sup>Ministry of Health, Kingdom of Saudi Arabia, School Health  
12

13 <sup>2</sup>Queen Mary, University of London, London, UK  
14

15 <sup>3</sup>NHSI England, UK  
16

17 <sup>4</sup>Paediatric Emergency Department, University Hospitals of Wales, UK  
18

19 <sup>5</sup>Krefting Research Centre, Institute of Medicine, University of Gothenburg, Sweden  
20

21 <sup>6</sup>Usher Institute of Population Health Sciences and Informatics, The University of Edinburgh,  
22 UK  
23

24 <sup>7</sup>Division of Population Medicine, School of Medicine, Cardiff University, Wales, UK  
25  
26  
27  
28  
29  
30  
31  
32  
33  
34  
35  
36  
37  
38  
39  
40  
41  
42  
43  
44  
45  
46  
47  
48  
49

Correspondence to:

Dr. Mahmoud Nahhas; [Manahas@moh.gov.sa](mailto:Manahas@moh.gov.sa)

Director General of School Health Department, Ministry of Health, Kingdom of Saudi Arabia

Riyadh, 11176

Phone: +966 112124624  
50

**Keywords**

51 Obesity, children, early years, epidemiology, risk factors, the Gulf Cooperation Council (GCC)  
52 countries, systematic review  
53  
54  
55  
56  
57  
58  
59  
60



**ABSTRACT**

**Introduction:** There has been a notable increase in the prevalence of overweight and obesity in school-aged children in many industrialised regions. The worldwide prevalence of childhood overweight and obesity increased from 4.2% in 1990 to 6.7% in 2010. Although many studies have been published, the epidemiological burden of overweight and obesity in the Gulf Cooperation Council (GCC) countries (Bahrain, Kuwait, Oman, Qatar, Saudi Arabia, and the United Arab Emirates) is unclear. There is a need to bring together and appraise relevant studies in order to estimate the epidemiological burden (including incidence, prevalence, risk factors, trend over time) of overweight and obesity in this region and thus help to inform national and regional policies.

**Methods and analysis:** We will conduct a systematic review and meta-analysis on the epidemiology of overweight and obesity in early childhood including incidence, prevalence, risk factors and trends over time in the GCC countries. We will search international electronic databases including MEDLINE, EMBASE, Cochrane Library, ISI Web of Science, CINAHL, Google Scholar, AMED, Psych INFO, CAB International, and WHO Global Health Library for published, unpublished and in-progress epidemiological studies of interest published from inception to 2017. In addition, we will contact an international panel of experts on the topic. There will be no restriction on the language of publication of studies. We will use the Effective Public Health Practice Project (EPHPP) to appraise the methodological quality of included studies. Meta-analysis will be undertaken using random effects models.

**Protocol registration number:** International Prospective Register for Systematic Reviews (PROSPERO) number CRD42017073189

**Ethics and dissemination:** Ethical approval is not required. The outcome of the review will be disseminated through conference presentations and peer-reviewed journal publication.

**Strengths and limitations of this study:**

- This systematic review will for the first time provide estimates of the epidemiological burden of overweight and obesity in early childhood across the GCC region and within each nation
- Understanding the burden of overweight and obesity during the early years will help to formulate and strengthen national family and school policies for children in this age group in the GCC region.
- Whilst this study will provide a comprehensive overview of the burden of overweight and obesity in the GCC region, we anticipate disparities across available

1  
2  
3 studies, and this will be taken into account in our interpretation of the underlying  
4 evidence.  
5  
6  
7

## 8 **INTRODUCTION**

9  
10 Childhood overweight and obesity is a global health problem, impacting the physical and  
11 psychological health of individuals for the duration of their life.<sup>1-5</sup> Childhood overweight and  
12 obesity strongly correlate with adult obesity, which is linked to an increased risk of morbidity  
13 and mortality.<sup>6,7</sup> Overweight or obese children have an increased risk of heart disease,  
14 diabetes and other health problems in adulthood.<sup>2</sup> The impact is not limited to the individual  
15 but carries a significant economic burden.<sup>8</sup> This is partially due to increased spending on  
16 healthcare with a German study estimating the excess lifetime cost of childhood overweight  
17 and obesity in the German population at €145 billion.<sup>9</sup>  
18  
19  
20  
21  
22  
23  
24

25 According to the World Health Organisation (WHO), 43 million children (35 million from  
26 developing countries) were estimated to be overweight and obese in 2010, while 92 million  
27 worldwide were at risk of being overweight.<sup>10</sup> In the same report, the worldwide prevalence  
28 of childhood overweight and obesity combined increased from 4.2% (95% CI: 3.2% to 5.2%)  
29 in 1990 to 6.7% (95% CI: 5.6% to 7.7%) in 2010. This trend is expected to reach 9.1% (95% CI:  
30 7.3%, 10.9%) or affect 60 million children by 2020.<sup>10</sup>  
31  
32  
33  
34  
35

36 The prevalence of childhood obesity is high among Gulf Cooperation Council (GCC) countries  
37 (Bahrain, Kuwait, Oman, Qatar, Saudi Arabia, and the United Arab Emirates), with the  
38 prevalence of obesity among pre-school children estimated to be between 8% to 9%.<sup>11</sup> In  
39 Kuwait, for instance, 40-49% of adolescents are obese.<sup>11</sup> Kuwait ranks among the top 7% of  
40 countries worldwide in reference to adult obesity prevalence,<sup>1,12</sup> and is among the top 3% of  
41 countries with the highest prevalence of diabetes.<sup>13</sup> The recognition of childhood overweight  
42 and obesity and the long-term consequences, has made it a high priority for health  
43 authorities in the GCC countries<sup>14,15</sup> and globally.<sup>1,16</sup>  
44  
45  
46  
47  
48  
49

50 Currently there is paucity of robust epidemiological data on childhood overweight and  
51 obesity in the GCC countries. A number of studies suggest that trends in childhood  
52 overweight and obesity in GCC countries may be increasing.<sup>17-21</sup> However, despite several  
53 studies that have been published the epidemiological burden of overweight or obesity in the  
54 GCC is currently unclear. Given differences in population structure, culture and lifestyle  
55  
56  
57  
58  
59  
60

1  
2  
3 habits, education, occupation, the risk factors for obesity may vary from population to  
4 population, hence risk factors may differ between the GCC countries and western  
5 countries.<sup>22</sup> There is a need to bring together the relevant available evidence and synthesise  
6 them in order to derive relevant epidemiological parameters (including incidence,  
7 prevalence, risk factors, trend over time) that will help to describe current burden of  
8 overweight and obesity in the GCC region. This will help to formulate or strengthen existing  
9 regional and national policies around obesity, particularly in relation to school and early  
10 years nutrition and lifestyle.  
11  
12  
13  
14  
15

16  
17 The early childhood concept model and framework has been developed in several countries.  
18 <sup>23,24</sup> Obesity can occur early in life with the prenatal and early childhood periods crucial for  
19 child growth and development. <sup>25,26</sup> In addition, important and powerful obesity risk factors  
20 can be identified within the first 1000 days of early life, from conception to 24 months.<sup>3</sup>  
21 Preventing the causes and consequences of childhood obesity, avoiding transition of obesity  
22 from early childhood to adulthood and altering early life systems promise the interruption of  
23 the continuing vicious cycle of the childhood obesity epidemic worldwide.<sup>27</sup>  
24  
25  
26  
27  
28

29 We plan to undertake a systematic review to identify, appraise and synthesise all available  
30 evidence on the epidemiology of overweight and obesity in children during the early years of  
31 life in the GCC region. Specifically, by bringing together all relevant published evidence, this  
32 systematic review aims to provide reliable and contemporaneous estimates of the incidence,  
33 prevalence, time trends, risk factors for childhood overweight and obesity in GCC countries  
34 in children during the early life years. The focus on the early years of childhood is to identify  
35 early dominant factors that may in the long-term help in formulating evidence-based  
36 policies for early interventions.  
37  
38  
39  
40  
41  
42  
43

## 44 **METHODS AND ANALYSES**

### 45 **Types of studies**

46  
47 We will include all interventional (randomised controlled trials, controlled before and after  
48 studies, and interrupted time series studies) and observational (cohort, case control, and  
49 cross-sectional studies) studies. The main source of data on the incidence and prevalence of  
50 obesity will come from cohort and cross-sectional studies, respectively. We will include  
51  
52  
53  
54  
55  
56  
57

1  
2  
3 interventional and case-control studies, as these will additionally provide data on risk factors  
4 for obesity. Reviews, case studies and case series, and animal studies will be excluded.  
5  
6

### 7 **Participants**

8 The participants will include all children in their early years (up to the child's 8th birthday).  
9 We will include and extract data only for children aged under 8 years old. If there are  
10 aggregated data and no sub-group analysis for children aged up to 8 years old we will  
11 exclude those papers.  
12  
13  
14

### 15 **Outcome measures**

16  
17 *Primary outcomes:* Our primary outcomes will include objectively defined measures of the  
18 incidence and prevalence of overweight and obesity, time trends in children aged up to 8  
19 years old in GCC countries. For consistency, we will use the standard, validated WHO  
20 definition of overweight and obesity in children based on body mass index (BMI)  
21 measurements.  
22  
23  
24  
25

26  
27  
28 *Secondary outcomes:* Secondary outcomes will include risk factors of overweight and obesity  
29 in children aged up to 8 years old in GCC countries.  
30  
31

### 32 **Search methods**

33 We will employ a highly sensitive search strategy to retrieve articles meeting the review  
34 criteria. We will include studies from 2000 onwards to capture current and strong evidence  
35 in this SR. Appendix 1 contains the search strategies developed for MEDLINE database  
36 interface, which we will adapt to search other databases. Databases to search will include  
37 MEDLINE, EMBASE, Cochrane Library, ISI Web of Science, CINAHL, Google Scholar, AMED,  
38 Psych INFO, CAB International, and WHO Global Health Library. Additional references will be  
39 located through searching the references cited in identified papers, as well as searching  
40 databases of the proceedings of international conferences, such as ISI Conference  
41 Proceedings Citation Index and ZETOC (British Library). For unpublished and ongoing studies,  
42 we will contact international experts in the field of research. There will be no language  
43 restrictions, and where possible we will translate literature in languages other than English  
44 and report any literature we are unable to translate.  
45  
46  
47  
48  
49  
50  
51  
52  
53  
54  
55  
56  
57  
58  
59  
60

### Study selection

Duplicate papers will be removed first before undertaking the screening. If there are multiple publications from the same population, we will use the main comprehensive paper that incorporates all relevant outcomes that meet our inclusion criteria. Two reviewers will independently check titles and abstracts of the retrieved articles according to the review criteria; any discrepancies will be resolved by consensus and a third reviewer will arbitrate disagreements. Full text copies of potentially relevant studies will be obtained and their eligibility for inclusion independently assessed by two reviewers; discrepancies will be resolved by consensus and disagreements will be arbitrated by a third reviewer.

### Quality assessment and analysis

Two reviewers (UN and FA; MN and SM) will independently appraise the quality of eligible studies and assess the potential for risk of bias; any discrepancies will be resolved by discussion or arbitration by a third reviewer (BN) in the event of any disagreement. We will also calculate the Kappa test a measure of the agreement between the reviewers regarding the quality of the studies. The methodological quality of intervention studies will be assessed following the recommendations of the Cochrane Effective Practice and Organization of Care Group.<sup>28</sup>

We will assess the methodological quality of observational studies by using the Effective Public Health Practice Project (EPHPP).<sup>29</sup> We will focus on the following domains to assess the quality of included studies: selection bias; study design; confounders; blinding; data collection method; withdrawals and dropouts; and final global rating. Each component-specific parameter (i.e. suitability of the study design for the research question; risk of selection bias; exposure measurement; outcome assessment; and generalizability of findings) will be given a judgement: “strong”; “moderate”; and “weak”. At the end of critical appraisal, we will also provide the overall grading for each study.

### Data extraction and reporting

Two reviewers will independently extract relevant information and study data onto a customized data extraction sheet (Appendix 2). Any discrepancies in data extraction will be resolved by discussion or arbitration by a third reviewer if agreement cannot be reached. Descriptive tables will be used to summarize the literature and characteristics of studies contributing to the overall evidence. We will employ the PRISMA checklist to guide the reporting of the review.<sup>30</sup>

### Data analysis

If studies deem to be reasonably clinically and methodologically homogenous, we will pool data statistically and conduct meta-analyses. Quantitative combination of the estimates will be done separately for the review outcomes: i.e. separately for prevalence, incidence, risk factors, and trend. Where applicable and feasible, we will convert between estimates in order to derive common estimates that will allow implementation of the meta-analysis. If the data is heterogeneous we will undertake a narrative synthesis of the data. We will quantify the heterogeneity between studies using the  $I^2$  statistic. Where possible, we will conduct a subgroup analysis for overweight and obesity outcomes based on sex, age group, study design, and country. We will perform sensitivity analyses based on risk of bias in the studies. We will assess evidence of publication bias using Funnel plots and statistically using Begg and Egger tests.<sup>31,32</sup> The meta-analyses will be performed using Comprehensive Meta-analysis, version 3.

### Protocol registration

A detailed protocol for the review has been registered with the International Prospective Register of Systematic Reviews (PROSPERO CRD42017073189): <http://www.crd.york.ac.uk/prospero/> prior to commencing the review.

### DISCUSSION

The current review will present the first comprehensive synthesis of the evidence relating the incidence, prevalence, time trends, and risk of obesity in children in the early years up to 8 years old in GCC countries. Our preliminary searches could not find any systematic reviews on this topic.

### CONCLUSION

Evidence generation and synthesis on up to date estimates of the incidence, prevalence, time trends, and risk factors of obesity/overweight in children in GCC countries will help to develop interventions for overweight or obese children. Furthermore, a comprehensive synthesis of the evidence base will provide the opportunity to create evidence-informed policies in these GCC countries in the prevention of obesity and overweight among children in the early years.

1  
2  
3 **Acknowledgements:** We thank the Ministry of Health of Saudi Arabia for retrieving  
4 unobtainable papers.  
5

6  
7 **Contributors:** UN and MN conceived the idea for this study. UN, BIN and FA developed the  
8 methods and together with SM and MN drafted this protocol. MN, UN, FA, SM will extract  
9 data, appraisal of papers, UN will conduct meta-analyses, draft a manuscript and all authors  
10 will contribute to the final synthesis of evidence.  
11  
12  
13

14  
15 **Competing of interests:** The authors declare no competing interest related to this work.  
16

17 **Funding:** None  
18  
19  
20  
21  
22  
23  
24  
25  
26  
27  
28  
29  
30  
31  
32  
33  
34  
35  
36  
37  
38  
39  
40  
41  
42  
43  
44  
45  
46  
47  
48  
49  
50  
51  
52  
53  
54  
55  
56  
57  
58  
59  
60

## REFERENCES

1. World Health Organisation. 2015. Childhood overweight and obesity report. Report of a WHO Consultation. WHO Technical Report Series, No. 894. Geneva: World Health Organisation. Assessed: <http://www.who.int/dietphysicalactivity/childhood/en/>
2. Sabin MA, Kao KT, Juonala M, Baur LA, Wake M. Viewpoint article : Childhood obesity – looking back over 50 years to begin to look forward. *Journal of Paediatrics and Child Health*. 2015;51:82-86.
3. Mameli C, Mazzantini S, Zuccotti GV. Nutrition in the first 1000 days: the origin of childhood obesity. *Int J Environ Res Public Health*. 2016;13:838.
4. El-Bayoumy I, Shady I, Lotfy H. Prevalence of obesity among adolescents (10–14 years) in Kuwait. *Asia-Pacific Journal of Public Health*. 2009;21:153-9.
5. Abdulrazzaq Y, Nagelkerke N, Mousa M. UAE population reference standard charts for body mass index and skinfold thickness, at ages 0–18 years. *International Journal of Food Sciences and Nutrition*. 2011;62:692-702.
6. Caliskan A, Atak N. A general review of childhood obesity. *TAF Prev Med Bull*. 2013;12(5):571-582.
7. Xu S, Xue Y. Pediatric obesity: causes, symptoms, prevention and treatment. *Exp Ther Med* 2016;11:15-20.
8. Tremmel M, Gerdtham Ulf-G, Nilsson PM, Saha S. Economic Burden of obesity: a systematic review. *Int J Environ Res Public Health*. 2017;14:435.
9. Sonntag D, Ali S, De Bock F. Lifetime indirect cost of childhood overweight and obesity: a decision analytic model. *Obesity* 2016;24:200-206.
10. De Onis M, Blossner M, Borghi E. Global prevalence and trends of overweight and obesity among preschool children. *Am J Clin Nutr* 2010;92(5):1257-64.
11. Ng SW, Zaghoul, Ali HI, Harrison G, Popkin BM. The prevalence and trends of overweight, obesity and nutrition-related non-communicable diseases in the Arabian Gulf States. *Obesity Reviews*. 2011;12:1-13.
12. WHO, "Global info base international comparisons," 2011, Available at: <https://apps.who.int/infobase/Comparisons.aspx>
13. Mousa M, Alsaedis M, Abdella N, Refaid S, Shelike N, Gomez E. Prevalence of type 2 diabetes mellitus among Kuwaiti children and adolescents. *Medical Principles and Practice*. 2008;270-5.
14. Padmakumar Ram. Management of Healthcare in the Gulf Cooperation Council (GCC) countries with special reference to Saudi Arabia. *International Journal of Academic Research in Business and Social Sciences*. 2014;4(12):24-41.
15. Amin TT, Al Sultan AI, Ayub A. Overweight and obesity and their relation to dietary habits and socio demographic characteristics among male primary school children in Al Hassa, Kingdom of Saudi Arabia. *Eur J Nutr* 2008;47(6):310-8.
16. Ogden CL, Carroll MD, Kit BK, Flegal KM. Prevalence of Childhood and Adult Obesity in the United States, 2011-2012. *JAMA*. 2014;311(8):806-814.
17. Mirmiran P, Sherafat-Kazemzadeh R, Jalali-Farahani S, Azizi F. Childhood obesity in the Middle East: a review. *Eastern Mediterranean Health Journal*. 2010;16:1009-17



18. Malik M, Bakir A. Prevalence of overweight and obesity among children in the United Arab Emirates. *Obesity Reviews*. 2006;8:15-20.
19. Al-Sendi A, Shetty P, Musaiger A. Prevalence of overweight and obesity among Bahraini adolescents: a comparison between three different sets of criteria. *European Journal of Clinical Nutrition*. 2003;57:471-4.
20. Eapen V, Mabrouk A, Yousef S. Metabolic syndrome among young obese in the United Arab Emirates. *Journal of Tropical Pediatrics*. 2010;56:325-8.
21. Al-Isa A, Akanji A, Thalib L. Prevalence of the metabolic syndrome among female Kuwaiti adolescents using two different criteria. *British Journal of Nutrition*. 2010;103:77
22. Wang L, Southerland J, Wang K, et al., Ethnic differences in risk factors for obesity among adults in California, the United States. *Journal of Obesity*. 2017; Hindawi, <https://doi.org/101155/2017/2427483>.
23. Available at: <http://gov.wales/topics/people-and-communities/people/children-and-young-people/early-years/?lang=en>
24. Available at: <http://www.gov.scot/Resource/Doc/257007/0076309.pdf>
25. Vine M, Hargreaves MB, Briefel RR, Orfield C. Expanding the role of primary care in the prevention and treatment of childhood obesity: a review of clinic- and community-based recommendations and interventions. *Journal of Obesity* 2013;17
26. Pandita A, Sharma D, Pandita D, Pawar S, Tariq M, Kaul A. Childhood obesity: prevention is better than cure. *Diabetes, Metabolic Syndrome and Obesity: Targets and Therapy* 2016;9:83-89
27. Nader PR, Huang T, Gahagan S, Kumanyika S, Hammond RA, Christoffel KK. Next steps in obesity prevention: altering early life systems to support healthy parents, infants, and toddlers. *Childhood obesity*. 2012;8(3):195-204.
28. Higgins JPT, Green S eds. *Cochrane Handbook for Systematic Reviews of Interventions* Version 5.1.0. The Cochrane Collaboration 2011. Available: <http://www.cochrane.org/training/cochrane-handbook>. Accessed: 9 October 2017.
29. The Effective Public Health Practice Project (EPHPP). Quality assessment tool for quantitative studies. Available from: <http://www.ephpp.ca/tools.html>
30. Moher D, Liberati A, Tetzlaff J, Altman DG, The PRISMA Group (2009). Preferred Reporting Items for Systematic Reviews and Meta-Analysis: The PRISMA Statement. *PLoS Med* 2009;6:e1000097.
31. Begg CB, Mazumdar M. Operating characteristics of a rank correlation test for publication bias. *Biometrics* 1994;50(4):1088-101.
32. Egger M, Smith GD, Schneider M, Minder C. Bias in meta-analysis detected by a simple. Graphical test. *BMJ* 1997;315(7109):629-34.

### Appendix 1: MEDLINE Search Strategy

1. pediatric obesity.mp. or exp Pediatric Obesity/
2. obesity in children.mp.
3. obesity.mp. or exp Obesity/ or exp Obesity, Morbid/
4. overweight.mp. or exp Overweight/
5. weight gain.mp. or exp Weight Gain/
6. (overweight or over weight or overeat\* or over eat\* or overfeed\* or over feed\*).ti,ab.
7. (weight adj1 gain\*).ti,ab.
8. obes\*.ti,ab.
9. exp Body Mass Index/ or body mass.mp.
10. (BMI or body mass index).ti,ab.
11. or/1-10
12. incidence.mp. or exp Incidence/
13. prevalence.mp. or exp Prevalence/
14. risk factors.mp. or exp Risk Factors/
15. (incidence or prevalence or epidemiol\$).ti.
16. epidemiologic methods.mp.
17. exp Epidemiologic Methods/
18. \*cohort studies/ or cohort.ti,ab.
19. (longitudinal or prospective).ti,ab.
20. \*case-control studies/
21. Control groups/ or control group\*.ti,ab.
22. Matched-pair analysis/
23. (case\* adj5 control\*).ti,ab.
24. (case\* adj3 comparison\*).ti,ab.
25. (case\* adj3 referen\*).mp.
26. (case\* adj1 base).mp.
27. (case\* adj1 cohort).mp.
28. exp cross-sectional studies/ or cross-sectional.ti,ab.
29. Controlled clinical trial.pt.
30. Randomized controlled trial.pt.
31. (random\$ or placebo\$ or single blind\$ or double blind\$ or triple blind\$).ti,ab.
32. Quasi-randomized Controlled Trial.mp.
33. (Controlled before and after).mp.
34. (Controlled before and after studies).mp.
35. Interrupted time series.mp.
36. Interrupted time series studies.mp.
37. or/12-36
38. Arab states of the Persian Gulf.mp.
39. Gulf Cooperation Council.mp.
40. Gulf countries.mp.
41. exp Saudi Arabia/ or Eastern Arabia.mp.
42. Kuwait.mp. or exp Kuwait/
43. Bahrain.mp. or exp Bahrain/
44. Oman.mp. or exp Oman/
45. Qatar.mp. or exp Qatar/
46. United Arab Emirates.mp. or exp United Arab Emirates/

- 1
- 2
- 3 47. or/38-46
- 4 48. 11 and 37 and 47
- 5 49. advertisements/ or animation/ or architectural drawings/ or bibliography/ or biography/
- 6 or book illustrations/ or bookplates/ or charts/ or comment/ or letter/ or editorial/ or news/ or
- 7 patient education handout/ or published erratum/ or "retraction of publication"/
- 8 50. 48 not 49
- 9
- 10
- 11
- 12
- 13
- 14
- 15
- 16
- 17
- 18
- 19
- 20
- 21
- 22
- 23
- 24
- 25
- 26
- 27
- 28
- 29
- 30
- 31
- 32
- 33
- 34
- 35
- 36
- 37
- 38
- 39
- 40
- 41
- 42
- 43
- 44
- 45
- 46
- 47
- 48
- 49
- 50
- 51
- 52
- 53
- 54
- 55
- 56
- 57
- 58
- 59
- 60

For peer review only

1  
2  
3  
4  
5  
6  
7  
8  
9  
10  
11  
12  
13  
14  
15  
16  
17  
18  
19  
20  
21  
22  
23  
24  
25  
26  
27  
28  
29  
30  
31  
32  
33  
34  
35  
36  
37  
38  
39  
40  
41  
42  
43  
44  
45  
46  
47

**Appendix 2**

**Table 1 Summary of evidence on the prevalence/incidence, risk/prognostic factors for obesity in GCC countries**

| Author, year, country | Age range | Prevalence/incidence |         | Outcomes | Factors studied |                    | Statistical analysis method | Results and comments |
|-----------------------|-----------|----------------------|---------|----------|-----------------|--------------------|-----------------------------|----------------------|
|                       |           | Overweight           | Obesity |          | Risk factors    | Prognostic factors |                             |                      |
|                       |           |                      |         |          |                 |                    |                             |                      |

**Table E1: The main features, main results of incidence and prevalence of obesity, and overall risk of bias assessment on the studies included in the systematic review on the epidemiology of obesity in GCC countries**

| Author, year, country | Study design | Inclusion/exclusion criteria | Study population N, source of study population |                     | Outcome assessment and definition |                    | Occurrence measure(s) | Main results of the incidence or prevalence of obesity Percentage (95% CI) | Overall risk of bias assessment |
|-----------------------|--------------|------------------------------|------------------------------------------------|---------------------|-----------------------------------|--------------------|-----------------------|----------------------------------------------------------------------------|---------------------------------|
|                       |              |                              | Number approached                              | Number participated | Outcome assessment                | Outcome definition |                       |                                                                            |                                 |
|                       |              |                              |                                                |                     |                                   |                    |                       |                                                                            |                                 |

**Table E2: Critical appraisal of included observational studies assessed by the Effective Public Health Practice Project (EPHPP)**

| Study, year | Design | Selection Bias |   |   | Study Design |   |   | Confounders |   |   | Blinding |   |   | Data Collection Method |   |   | Withdrawals and Dropouts |   |   | Global Rating |   |   |  |  |  |
|-------------|--------|----------------|---|---|--------------|---|---|-------------|---|---|----------|---|---|------------------------|---|---|--------------------------|---|---|---------------|---|---|--|--|--|
|             |        | S              | M | W | S            | M | W | S           | M | W | S        | M | W | S                      | M | W | S                        | M | W | S             | M | W |  |  |  |
|             |        |                |   |   |              |   |   |             |   |   |          |   |   |                        |   |   |                          |   |   |               |   |   |  |  |  |

Abbreviations:

- S Strong
- M Moderate
- W Weak
- NA Not applicable

PRISMA-P (Preferred Reporting Items for Systematic review and Meta-Analysis Protocols) 2015 checklist: recommended items to address in a systematic review protocol

Epidemiology of overweight and obesity in early childhood in the Gulf Cooperation Council countries: a systematic review and meta-analysis protocol

| <i>Section/topic</i>                                        | <i>#</i>       | <i>Checklist item</i>                                                                                                                                                                                                            | <i>Reported on page #</i>  |
|-------------------------------------------------------------|----------------|----------------------------------------------------------------------------------------------------------------------------------------------------------------------------------------------------------------------------------|----------------------------|
| <b>ADMINISTRATIVE INFORMATION</b>                           |                |                                                                                                                                                                                                                                  |                            |
| Title Identification Update                                 | 1a<br>1b       | Identify the report as a protocol of a systematic review<br>If the protocol is for an update of a previous systematic review, identify as such                                                                                   | 1                          |
| Registration                                                | 2              | If registered, provide the name of the registry (such as PROSPERO) and registration number                                                                                                                                       | PROSPERO<br>CRD42017073189 |
| Authors:<br>Contact<br>Contributions                        | 3a<br>3b       | Provide name, institutional affiliation, e-mail address of all protocol authors; provide physical mailing address of corresponding author<br>Describe contributions of protocol authors and identify the guarantor of the review | 1<br>1, 7                  |
| Amendments                                                  | 4              | If the protocol represents an amendment of a previously completed or published protocol, identify as such and list changes; otherwise, state plan for documenting important protocol amendments                                  | NA                         |
| Support:<br>Sources<br>Sponsor<br>Role of sponsor or funder | 5a<br>5b<br>5c | Indicate sources of financial or other support for the review<br>Provide name for the review funder and/or sponsor<br>Describe roles of funder(s), sponsor(s), and/or institution(s), if any, in developing the protocol         | NA<br>NA<br>NA             |
| <b>INTRODUCTION</b>                                         |                |                                                                                                                                                                                                                                  |                            |
| Rationale                                                   | 6              | Describe the rationale for the review in the context of what is already known                                                                                                                                                    | 2                          |
| Objectives                                                  | 7              | Provide an explicit statement of the question(s) the review will address with reference to participants, interventions, comparators, and outcomes (PICO)                                                                         | 4                          |
| <b>METHODS</b>                                              |                |                                                                                                                                                                                                                                  |                            |

| <i>Section/topic</i>               | <i>#</i> | <i>Checklist item</i>                                                                                                                                                                                                                                     | <i>Reported on page #</i> |
|------------------------------------|----------|-----------------------------------------------------------------------------------------------------------------------------------------------------------------------------------------------------------------------------------------------------------|---------------------------|
| Eligibility criteria               | 8        | Specify the study characteristics (such as PICO, study design, setting, time frame) and report characteristics (such as years considered, language, publication status) to be used as criteria for eligibility for the review                             | 4,5                       |
| Information sources                | 9        | Describe all intended information sources (such as electronic databases, contact with study authors, trial registers or other grey literature sources) with planned dates of coverage                                                                     | 4-6                       |
| Search strategy                    | 10       | Present draft of search strategy to be used for at least one electronic database, including planned limits, such that it could be repeated                                                                                                                | 9,10                      |
| Study records:                     |          |                                                                                                                                                                                                                                                           |                           |
| Data management                    | 11a      | Describe the mechanism(s) that will be used to manage records and data throughout the review                                                                                                                                                              | 6                         |
| Selection process                  | 11b      | State the process that will be used for selecting studies (such as two independent reviewers) through each phase of the review (that is, screening, eligibility and inclusion in meta-analysis)                                                           | 5                         |
| Data collection process            | 11c      | Describe planned method of extracting data from reports (such as piloting forms, done independently, in duplicate), any processes for obtaining and confirming data from investigators                                                                    | 5                         |
| Data items                         | 12       | List and define all variables for which data will be sought (such as PICO items, funding sources), any pre-planned data assumptions and simplifications                                                                                                   | 4-6                       |
| Outcomes and prioritization        | 13       | List and define all outcomes for which data will be sought, including prioritization of main and additional outcomes, with rationale                                                                                                                      | 4                         |
| Risk of bias in individual studies | 14       | Describe anticipated methods for assessing risk of bias of individual studies, including whether this will be done at the outcome or study level, or both; state how this information will be used in data synthesis                                      | 5                         |
| Data synthesis                     | 15a      | Describe criteria under which study data will be quantitatively synthesised                                                                                                                                                                               | 5,6                       |
|                                    | 15b      | If data are appropriate for quantitative synthesis, describe planned summary measures, methods of handling data and methods of combining data from studies, including any planned exploration of consistency (such as I <sup>2</sup> , Kendall's $\tau$ ) | 6                         |
|                                    | 15c      | Describe any proposed additional analyses (such as sensitivity or subgroup analyses, meta-regression)                                                                                                                                                     | 6                         |
|                                    | 15d      | If quantitative synthesis is not appropriate, describe the type of summary planned                                                                                                                                                                        | 6                         |
| Meta-bias(es)                      | 16       | Specify any planned assessment of meta-bias(es) (such as publication bias across studies, selective reporting within studies)                                                                                                                             | 6                         |
| Confidence in cumulative evidence  | 17       | Describe how the strength of the body of evidence will be assessed (such as GRADE)                                                                                                                                                                        | 4-6                       |
