# Supplementary material for: Epidemiology of overweight and obesity in early childhood in the Gulf Cooperation Council countries: a systematic review and meta-analysis protocol
Source: PubMed Central journal article supplement — BMJ Open. 2018 Jun 8;8(6):e019363. doi: 10.1136/bmjopen-2017-019363 (PMC6009465; doi:10.1136/bmjopen-2017-019363), 2018-06-08
Supplement: bmjopen-2017-019363supp001.pdf [file bmjopen-2017-019363supp001.pdf]

## Appendix 1: MEDLINE Search Strategy

1. pediatric obesity.mp. or exp Pediatric Obesity/
2. obesity in children.mp.
3. obesity.mp. or exp Obesity/ or exp Obesity, Morbid/
4. overweight.mp. or exp Overweight/
5. weight gain.mp. or exp Weight Gain/
6. (overweight or over weight or overeat\* or over eat\* or overfeed\* or over feed\*).ti,ab.
7. (weight adj1 gain\*).ti,ab.
8. obes\*.ti,ab.
9. exp Body Mass Index/ or body mass.mp.
10. (BMI or body mass index).ti,ab.
11. or/1-10
12. incidence.mp. or exp Incidence/
13. prevalence.mp. or exp Prevalence/
14. risk factors.mp. or exp Risk Factors/
15. (incidence or prevalence or epidemiol\$).ti.
16. epidemiologic methods.mp.
17. exp Epidemiologic Methods/
18. \*cohort studies/ or cohort.ti,ab.
19. (longitudinal or prospective).ti,ab.
20. \*case-control studies/
21. Control groups/ or control group\*.ti,ab.
22. Matched-pair analysis/
23. (case\* adj5 control\*).ti,ab.
24. (case\* adj3 comparison\*).ti,ab.
25. (case\* adj3 referen\*).mp.
26. (case\* adj1 base).mp.
27. (case\* adj1 cohort).mp.
28. exp cross-sectional studies/ or cross-sectional.ti,ab.
29. Controlled clinical trial.pt.
30. Randomized controlled trial.pt.
31. (random\$ or placebo\$ or single blind\$ or double blind\$ or triple blind\$).ti,ab.
32. Quasi-randomized Controlled Trial.mp.
33. (Controlled before and after).mp.
34. (Controlled before and after studies).mp.
35. Interrupted time series.mp.
36. Interrupted time series studies.mp.
37. or/12-36
38. Arab states of the Persian Gulf.mp.
39. Gulf Cooperation Council.mp.
40. Gulf countries.mp.
41. exp Saudi Arabia/ or Eastern Arabia.mp.
42. Kuwait.mp. or exp Kuwait/
43. Bahrain.mp. or exp Bahrain/
44. Oman.mp. or exp Oman/
45. Qatar.mp. or exp Qatar/
46. United Arab Emirates.mp. or exp United Arab Emirates/

- 47. or/38-46
- 48. 11 and 37 and 47
- 49. advertisements/ or animation/ or architectural drawings/ or bibliography/ or biography/  
or book illustrations/ or bookplates/ or charts/ or comment/ or letter/ or editorial/ or news/ or  
patient education handout/ or published erratum/ or "retraction of publication"/
- 50. 48 not 49
