# Supplementary material for: Epidemiology of overweight and obesity in early childhood in the Gulf Cooperation Council countries: a systematic review and meta-analysis protocol
Source: PubMed Central journal article supplement — BMJ Open. 2018 Jun 8;8(6):e019363. doi: 10.1136/bmjopen-2017-019363 (PMC6009465; doi:10.1136/bmjopen-2017-019363), 2018-06-08
Supplement: bmjopen-2017-019363supp002.pdf [file bmjopen-2017-019363supp002.pdf]

## Appendix 2

**Table 1 Summary of evidence on the prevalence/incidence, risk/prognostic factors for obesity in GCC countries**

| Author, year, country | Age range | Prevalence/incidence |         | Outcomes | Factors studied |                    | Statistical analysis method | Results and comments |
|-----------------------|-----------|----------------------|---------|----------|-----------------|--------------------|-----------------------------|----------------------|
|                       |           | Overweight           | Obesity |          | Risk factors    | Prognostic factors |                             |                      |
|                       |           |                      |         |          |                 |                    |                             |                      |

**Table E1: The main features, main results of incidence and prevalence of obesity, and overall risk of bias assessment on the studies included in the systematic review on the epidemiology of obesity in GCC countries**

| Author, year, country | Study design | Inclusion/exclusion criteria | Study population<br>N, source of study population |                     | Outcome assessment and definition |                    | Occurrence measure(s) | Main results of the incidence or prevalence of obesity<br>Percentage<br>(95% CI) | Overall risk of bias assessment |
|-----------------------|--------------|------------------------------|---------------------------------------------------|---------------------|-----------------------------------|--------------------|-----------------------|----------------------------------------------------------------------------------|---------------------------------|
|                       |              |                              | Number approached                                 | Number participated | Outcome assessment                | Outcome definition |                       |                                                                                  |                                 |
|                       |              |                              |                                                   |                     |                                   |                    |                       |                                                                                  |                                 |

**Table E2: Critical appraisal of included observational studies assessed by the Effective Public Health Practice Project (EPHPP)**

| Study, year | Design | Selection Bias |   |   | Study Design |   |   | Confounders |   |   | Blinding |   |   | Data Collection Method |   |   | Withdrawals and Dropouts |   |   | Global Rating |   |   |  |
|-------------|--------|----------------|---|---|--------------|---|---|-------------|---|---|----------|---|---|------------------------|---|---|--------------------------|---|---|---------------|---|---|--|
|             |        | S              | M | W | S            | M | W | S           | M | W | S        | M | W | S                      | M | W | S                        | M | W | S             | M | W |  |
|             |        |                |   |   |              |   |   |             |   |   |          |   |   |                        |   |   |                          |   |   |               |   |   |  |

Abbreviations:

S Strong  
M Moderate  
W Weak  
NA Not applicable
